# Supplementary material for: Preferences of people with type 2 diabetes for telemedical lifestyle programmes in Germany: protocol of a discrete choice experiment
Source: PubMed Central journal article supplement — BMJ Open. 2020 Sep 9;10(9):e036995. doi: 10.1136/bmjopen-2020-036995 (PMC7482475; doi:10.1136/bmjopen-2020-036995), 2020-09-09
Supplement: bmjopen-2020-036995.draft_revisions.pdf [file bmjopen-2020-036995.draft_revisions.pdf]

# BMJ Open

BMJ Open is committed to open peer review. As part of this commitment we make the peer review history of every article we publish publicly available.

When an article is published we post the peer reviewers' comments and the authors' responses online. We also post the versions of the paper that were used during peer review. These are the versions that the peer review comments apply to.

The versions of the paper that follow are the versions that were submitted during the peer review process. They are not the versions of record or the final published versions. They should not be cited or distributed as the published version of this manuscript.

BMJ Open is an open access journal and the full, final, typeset and author-corrected version of record of the manuscript is available on our site with no access controls, subscription charges or pay-per-view fees (<http://bmjopen.bmj.com>).

If you have any questions on BMJ Open's open peer review process please email [info.bmjopen@bmj.com](mailto:info.bmjopen@bmj.com)

# BMJ Open

## Preferences of people with type 2 diabetes for tele-medical lifestyle programmes in Germany: Protocol of a discrete choice experiment

|                               |                                                                                                                                                                                                                                                                                                                                                                                                                                                                                                                                                                                                                                                                                                                                                                                                                                                                                                                                                                                                                                                                                                                                                                                                                                                                                                                                                                                                                                                                                                                                                                                                                                                                                                                                                                                                                                                                                                                                                                                                                                                                                                                                                                                                                                                                                                                                                                                                       |
|-------------------------------|-------------------------------------------------------------------------------------------------------------------------------------------------------------------------------------------------------------------------------------------------------------------------------------------------------------------------------------------------------------------------------------------------------------------------------------------------------------------------------------------------------------------------------------------------------------------------------------------------------------------------------------------------------------------------------------------------------------------------------------------------------------------------------------------------------------------------------------------------------------------------------------------------------------------------------------------------------------------------------------------------------------------------------------------------------------------------------------------------------------------------------------------------------------------------------------------------------------------------------------------------------------------------------------------------------------------------------------------------------------------------------------------------------------------------------------------------------------------------------------------------------------------------------------------------------------------------------------------------------------------------------------------------------------------------------------------------------------------------------------------------------------------------------------------------------------------------------------------------------------------------------------------------------------------------------------------------------------------------------------------------------------------------------------------------------------------------------------------------------------------------------------------------------------------------------------------------------------------------------------------------------------------------------------------------------------------------------------------------------------------------------------------------------|
| Journal:                      | <i>BMJ Open</i>                                                                                                                                                                                                                                                                                                                                                                                                                                                                                                                                                                                                                                                                                                                                                                                                                                                                                                                                                                                                                                                                                                                                                                                                                                                                                                                                                                                                                                                                                                                                                                                                                                                                                                                                                                                                                                                                                                                                                                                                                                                                                                                                                                                                                                                                                                                                                                                       |
| Manuscript ID                 | bmjopen-2020-036995                                                                                                                                                                                                                                                                                                                                                                                                                                                                                                                                                                                                                                                                                                                                                                                                                                                                                                                                                                                                                                                                                                                                                                                                                                                                                                                                                                                                                                                                                                                                                                                                                                                                                                                                                                                                                                                                                                                                                                                                                                                                                                                                                                                                                                                                                                                                                                                   |
| Article Type:                 | Protocol                                                                                                                                                                                                                                                                                                                                                                                                                                                                                                                                                                                                                                                                                                                                                                                                                                                                                                                                                                                                                                                                                                                                                                                                                                                                                                                                                                                                                                                                                                                                                                                                                                                                                                                                                                                                                                                                                                                                                                                                                                                                                                                                                                                                                                                                                                                                                                                              |
| Date Submitted by the Author: | 14-Jan-2020                                                                                                                                                                                                                                                                                                                                                                                                                                                                                                                                                                                                                                                                                                                                                                                                                                                                                                                                                                                                                                                                                                                                                                                                                                                                                                                                                                                                                                                                                                                                                                                                                                                                                                                                                                                                                                                                                                                                                                                                                                                                                                                                                                                                                                                                                                                                                                                           |
| Complete List of Authors:     | <p>Sommer, Jana; German Diabetes Center, Leibniz Center for Diabetes Research at the Heinrich Heine University Düsseldorf, Institute for Health Services Research and Health Economics; Heinrich Heine University Düsseldorf, Institute for Health Services Research and Health Economics, Centre for Health and Society, Faculty of Medicine</p> <p>Dyczmons, Jan; German Diabetes Center, Leibniz Center for Diabetes Research at the Heinrich Heine University Düsseldorf, Institute for Health Services Research and Health Economics; Heinrich Heine University Düsseldorf, Institute for Health Services Research and Health Economics, Centre for Health and Society, Faculty of Medicine</p> <p>Grobosch, Sandra; German Diabetes Center, Leibniz Center for Diabetes Research at the Heinrich Heine University Düsseldorf, Institute for Health Services Research and Health Economics; Heinrich Heine University Düsseldorf, Institute for Health Services Research and Health Economics, Centre for Health and Society, Faculty of Medicine</p> <p>Gontscharuk, Veronika; Heinrich Heine University Düsseldorf, Institute for Health Services Research and Health Economics, Centre for Health and Society, Faculty of Medicine; German Diabetes Center, Leibniz Center for Diabetes Research at the Heinrich Heine University Düsseldorf, Institute for Health Services Research and Health Economics</p> <p>Vomhof, Markus; German Diabetes Center, Leibniz Center for Diabetes Research at the Heinrich Heine University Düsseldorf, Institute for Health Services Research and Health Economics; Heinrich Heine University Düsseldorf, Institute for Health Services Research and Health Economics, Centre for Health and Society, Faculty of Medicine</p> <p>Roden, Michael; German Diabetes Center, Leibniz Center for Diabetes Research at the Heinrich Heine University Düsseldorf, Institute for Clinical Diabetology; Heinrich Heine University Düsseldorf, Division of Endocrinology and Diabetology, Faculty of Medicine</p> <p>Icks, Andrea; Heinrich Heine University Düsseldorf, Institute for Health Services Research and Health Economics, Centre for Health and Society, Faculty of Medicine; German Diabetes Center, Leibniz Center for Diabetes Research at the Heinrich Heine University Düsseldorf, Institute for Health Services Research and Health Economics</p> |
| Keywords:                     | Telemedicine < BIOTECHNOLOGY & BIOINFORMATICS, STATISTICS & RESEARCH METHODS, Protocols & guidelines < HEALTH SERVICES ADMINISTRATION & MANAGEMENT, Health economics < HEALTH SERVICES ADMINISTRATION & MANAGEMENT, General diabetes <                                                                                                                                                                                                                                                                                                                                                                                                                                                                                                                                                                                                                                                                                                                                                                                                                                                                                                                                                                                                                                                                                                                                                                                                                                                                                                                                                                                                                                                                                                                                                                                                                                                                                                                                                                                                                                                                                                                                                                                                                                                                                                                                                                |

1  
2  
3  
4  
5  
6  
7  
8  
9  
10  
11  
12  
13  
14  
15  
16  
17  
18  
19  
20  
21  
22  
23  
24  
25  
26  
27  
28  
29  
30  
31  
32  
33  
34  
35  
36  
37  
38  
39  
40  
41  
42  
43  
44  
45  
46  
47  
48  
49  
50  
51  
52  
53  
54  
55  
56  
57  
58  
59  
60

|  |                                                |
|--|------------------------------------------------|
|  | DIABETES & ENDOCRINOLOGY, QUALITATIVE RESEARCH |
|  |                                                |

SCHOLARONE™  
Manuscripts

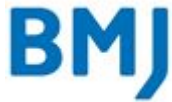

I, the Submitting Author has the right to grant and does grant on behalf of all authors of the Work (as defined in the below author licence), an exclusive licence and/or a non-exclusive licence for contributions from authors who are: i) UK Crown employees; ii) where BMJ has agreed a CC-BY licence shall apply, and/or iii) in accordance with the terms applicable for US Federal Government officers or employees acting as part of their official duties; on a worldwide, perpetual, irrevocable, royalty-free basis to BMJ Publishing Group Ltd ("BMJ") its licensees and where the relevant Journal is co-owned by BMJ to the co-owners of the Journal, to publish the Work in this journal and any other BMJ products and to exploit all rights, as set out in our [licence](#).

The Submitting Author accepts and understands that any supply made under these terms is made by BMJ to the Submitting Author unless you are acting as an employee on behalf of your employer or a postgraduate student of an affiliated institution which is paying any applicable article publishing charge ("APC") for Open Access articles. Where the Submitting Author wishes to make the Work available on an Open Access basis (and intends to pay the relevant APC), the terms of reuse of such Open Access shall be governed by a Creative Commons licence – details of these licences and which [Creative Commons](#) licence will apply to this Work are set out in our licence referred to above.

Other than as permitted in any relevant BMJ Author's Self Archiving Policies, I confirm this Work has not been accepted for publication elsewhere, is not being considered for publication elsewhere and does not duplicate material already published. I confirm all authors consent to publication of this Work and authorise the granting of this licence.

1  
2 **1 Preferences of people with type 2 diabetes for tele-medical lifestyle programmes in**  
3  
4 **2 Germany: Protocol of a discrete choice experiment**  
5

6 3 Jana Sommer<sup>1,2,3</sup> \*, Jan Dyczmons<sup>1,2,3</sup>, Sandra Grobosch<sup>1,2,3</sup>, Veronika Gontscharuk<sup>1,2,3</sup>,  
7  
8 4 Markus Vomhof<sup>1,2,3</sup>, Michael Roden<sup>3,4,5</sup>, and Andrea Icks<sup>1,2,3</sup>  
9  
10

11 5  
12  
13 6 <sup>1</sup> Institute for Health Services Research and Health Economics, German Diabetes Center  
14 (DDZ), Leibniz Center for Diabetes Research at the Heinrich Heine University, Auf'm  
15 Hennekamp 65, 40225 Duesseldorf, Germany  
16  
17

18 8  
19 9 <sup>2</sup> Institute for Health Services Research and Health Economics, Centre for Health and Society,  
20 Medical Faculty, Heinrich Heine University, Moorenstraße 5, 40225 Duesseldorf, Germany  
21  
22

23 10  
24 11 <sup>3</sup> German Center for Diabetes Research (DZD), Ingolstaedter Landstraße 1, 85764 Neuherberg,  
25 Germany  
26  
27

28 12  
29 13 <sup>4</sup> Institute for Clinical Diabetology, German Diabetes Center (DDZ), Leibniz Center for  
30 Diabetes Research at the Heinrich Heine University, Auf'm Hennekamp 65, 40225  
31 Duesseldorf, Germany  
32  
33

34 15  
35 16 <sup>5</sup> Division of Endocrinology and Diabetology, Medical Faculty, Heinrich Heine University,  
36 Moorenstraße 5, 40225 Duesseldorf, Germany  
37  
38

39 17  
40 18 \* Corresponding author

41 19 Jana Sommer \*, Dr., jana.sommer@hhu.de, Phone: +49 211 8106503  
42  
43

44 20  
45  
46 21 Word count: 3956; Abstract: 267, Number of figures: 1, Number of tables: 1, Number of  
47  
48 supplementary material: 1  
49  
50  
51  
52  
53  
54  
55  
56  
57  
58  
59  
60

## 23 **ABSTRACT**

### 24 **Introduction**

25 Tele-medical lifestyle programmes provide an opportunity to improve the adherence to  
26 lifestyle-changing programmes for people with type 2 diabetes mellitus (T2DM). When  
27 implementing new programmes into standard care, it is important to consider patients'  
28 preferences in order to maximise their success. This study aims to examine the preferences of  
29 people with T2DM with respect to tele-medical lifestyle programmes alongside a randomised-  
30 controlled trial (RCT).

### 31 **Methods and analysis**

32 We outline the protocol of the development and assessment of a discrete choice experiment  
33 (DCE) to examine patient preferences in a tele-medical lifestyle programme with regard to the  
34 functions of the online portal, communication, responsibilities, group activities, and time  
35 requirements. To develop the design of the DCE, we conducted pilot work involving health  
36 care experts and in particular people with T2DM using cognitive pretesting. The final DCE is  
37 being implemented alongside a RCT investigating whether participation in a tele-medical  
38 lifestyle intervention programme sustainably improves the HbA<sub>1c</sub> values of people with T2DM.  
39 Preferences are being assessed before and after participants complete the programme. About  
40 850 members of a large German statutory health insurance are being recruited to participate.  
41 The DCE data will be analysed using regression analysis.

### 42 **Ethics and dissemination**

43 The DCE study has been approved by the ethics committee of the medical faculty of the  
44 Heinrich Heine University Duesseldorf, registration number 2018-242-ProspDEuA, registered  
45 on December 6<sup>th</sup>, 2018. The TeLIPro trial is registered at the U. S. National Library of  
46 Medicine, registration number NCT03675919, registered on September 15<sup>th</sup>, 2018. We aim to  
47 disseminate our results in peer-reviewed journals, at national and international conferences,  
48 and among interested patient groups and the public.

1  
2  
3  
4 49 **Strengths and limitations of this study**

- 5  
6 50 • We use a DCE to assess the preferences of people with T2DM participating in a tele-  
7  
8 51 medical lifestyle programme, before and after they complete the programme.  
9  
10 52 • DCE data enable us to retrieve relative preference weights from which we can learn  
11  
12 53 which characteristics of a tele-medical lifestyle programme are most important to the  
13  
14 54 participants.  
15  
16 55 • Since the DCE was developed on the basis of the TeLIPro trial, the transferability of  
17  
18 56 the DCE to other tele-medical lifestyle programmes is limited.  
19  
20  
21  
22 57

23  
24 58 **Keywords**

25  
26 59 Patient preferences, discrete choice experiment, lifestyle changes, Type 2 diabetes mellitus,  
27  
28 60 tele-medical coaching, lifestyle intervention, preference elicitation, preference assessment,  
29  
30 61 lifestyle changing programme  
31  
32  
33  
34  
35  
36  
37  
38  
39  
40  
41  
42  
43  
44  
45  
46  
47  
48  
49  
50  
51  
52  
53  
54  
55  
56  
57  
58  
59  
60

## 62 INTRODUCTION

63 The prevalence of diagnosed diabetes in the world is continuously increasing[1]. In 2019, more  
64 than 9.5 million adults were diagnosed with diabetes in Germany, most of them with type 2  
65 diabetes mellitus (T2DM)[2]. The health expenditures of people diagnosed with diabetes are  
66 about twice as high as those of people without diabetes. Approximately two thirds of the total  
67 expenditures for the medical treatment of diabetes in Germany are incurred for the treatment  
68 of diabetes-related comorbidities[3]. Besides demographic aging, a lifestyle characterised by  
69 little physical activity and a high caloric diet is assumed to be largely responsible for the  
70 increasing prevalence of T2DM[2].

### 72 **Lifestyle programmes as part of T2DM treatment**

73 Besides antihyperglycemic treatment, an effective T2DM therapy includes programmes aimed  
74 at lifestyle changes, including changes in dietary habits and improvements in physical activity.  
75 Since these programmes have significantly reduced T2DM participants' haemoglobin A<sub>1c</sub>  
76 (HbA<sub>1c</sub>) levels, they may help to reduce the progression of the disease[4–8]. Thus, lifestyle  
77 programmes for improving diabetes self-management have been included in clinical guidelines  
78 and international position statements for the treatment of people with T2DM[9–11]. Although  
79 education tools and disease management programmes are available for all patients in Germany,  
80 some patients may have difficulties implementing a successful lifestyle change in everyday life  
81 in the long term[12].

### 83 **Tele-medical health programmes as an effective, easy-access treatment approach**

84 Tele-medical health programmes use digital health technologies to offer up-to-date easy access  
85 and most notably a location-independent way to support patients in managing their diabetes  
86 and integrating a healthier lifestyle into their daily lives. Besides technical aids such as apps,  
87 internet platforms, and mobile measurement devices, a personal health coach is often an



1  
2  
3  
4 88 integral part of such a programme[13–16]. The health coach evaluates the digital health data  
5  
6 89 that are obtained and derives recommendations (e.g., to increase physical activity or implement  
7  
8 90 a healthy diet). A proof of concept study showed that participation in a tele-medical health  
9  
10 91 intervention programme that focused on eating behaviour, but also included support from a  
11  
12 92 personal health coach, led to significant reductions in HbA<sub>1c</sub>, weight, blood pressure, and other  
13  
14 93 cardiovascular risk factors in people with T2DM. Furthermore, a reduction in the medication  
15  
16 94 demand, using the medication effect score which is based on the potency and dosage of diabetes  
17  
18 95 medication, and the insulin demand was achieved, also quality of life and eating behaviour  
19  
20 96 improved significantly[14].  
21  
22  
23  
24  
25

#### 26 98 **Patient preferences as an essential part of patient centeredness**

27  
28 99 Although digital health technologies and coaching approaches play an increasingly important  
29  
30 100 role in diabetes care,[13–19] little is known about the underlying decision-making process  
31  
32 101 regarding the participation and adherence of the target groups to tele-medical lifestyle  
33  
34 102 programmes. One promising approach to examine why some people participate and succeed in  
35  
36 103 lifestyle-changing programmes and others do not is to ask patients about their preferences for  
37  
38 104 different aspects of these programmes. Preferences answer the question of which alternative is  
39  
40 105 most favourably evaluated by patients (e.g., which type of lifestyle programme is preferred).  
41  
42 106 According to Scholl et al., the consideration of patient preferences is an essential part of patient  
43  
44 107 centeredness[20]. Moreover, consideration of patients' preferences has shown a significant,  
45  
46 108 albeit small, positive effect on treatment outcomes, (e.g., drug adherence)[21–23]. An  
47  
48 109 increasingly popular method for eliciting patient preferences in health care is the discrete  
49  
50 110 choice experiment (DCE),[24–28] a stated preference method. The DCE methodology – based  
51  
52 111 on the Random Utility Theory – allows researchers to estimate and contrast the relative  
53  
54 112 strengths of preferences across a range of particular attributes. To date, studies using a DCE to  
55  
56 113 elicit preferences in people with diabetes have mostly examined their preferences regarding  
57  
58  
59  
60

1  
2  
3  
4 114 treatment[29–23] and lifestyle changes[234–36]. Thus, there remains a need for a clarification  
5  
6 115 of patients' preferences regarding the relative importance of attributes with respect to tele-  
7  
8 116 medical lifestyle programmes and coaching approaches (e.g., involvement of the coach,  
9  
10 117 internet platforms, mobile measurement instruments, or type of support). Knowledge of these  
11  
12 118 preferences and identification of groups of patients with similar preferences may be helpful for  
13  
14 119 designing more tailored, patient-centred tele-medical lifestyle programmes.  
15  
16  
17  
18  
19

### 20 121 **Contribution to the field & Aims**

21  
22 122 With this study, we aim (i) to measure preferences of people with T2DM regarding tele-  
23  
24 123 medical lifestyle programmes and (ii) to compare participants' preferences before and after the  
25  
26 124 intervention so that we have the preferences of uninformed naive programme participants and  
27  
28 125 informed experienced programme participants. The former will help to address new  
29  
30 126 programme participants when implementing tele-medical lifestyle programmes into standard  
31  
32 127 health care, whereas the latter will provide information about changes over the course of the  
33  
34 128 intervention. We also aim (iii) to study possible preference heterogeneity. Finally, we aim (iv)  
35  
36 129 to investigate whether tele-medical lifestyle programme preferences are able to predict  
37  
38 130 programme success because a match between programme preferences and content might  
39  
40 131 increase adherence to the programme. The results will contribute to improving future patient-  
41  
42 132 centred lifestyle programmes so that they are better aligned with the preferences of potential  
43  
44 133 participants.  
45  
46  
47  
48  
49

50 134

### 51 52 135 **METHODS AND ANALYSIS**

53  
54  
55 136 The investigation of patient preferences for tele-medical lifestyle programmes will be  
56  
57 137 performed alongside a randomised-controlled trial (RCT) of the Tele-medical Lifestyle  
58  
59 138 intervention Programme TeLIPro[37]. Next, we briefly describe the TeLIPro Health

1  
2  
3  
4 139 Programme and the RCT, and then we outline the assessment of patient preferences via a DCE  
5  
6 140 in detail.

7  
8  
9 141

## 10 142 **The TeLIPro Health Programme**

11  
12  
13 143 TeLIPro (TeLIPro Health Programme - Active with Diabetes) is a tele-medical lifestyle  
14  
15 144 programme in Germany designed to help people with T2DM implement a healthy lifestyle  
16  
17 145 through patient-centred and personal care[37]. Participants receive tele-medical devices, access  
18  
19 146 to a secured tele-medical online portal, and tele-medical coaching from a personal health coach  
20  
21 147 who supports and accompanies them for the duration of the programme. The programme is  
22  
23 148 intended to improve blood glucose levels and therefore to improve or maintain the health status  
24  
25 149 and the quality of life of the participants in the long-term. Ultimately, this should minimise the  
26  
27 150 risk for concomitant and secondary diseases. The integration of the technology also supports  
28  
29 151 the scalability of the programme, enabling it to meet the individual preferences and needs of  
30  
31 152 the participants.  
32  
33  
34  
35

36 153

## 37 38 154 **The RCT: The TeLIPro trial**

39  
40  
41 155 The TeLIPro trial is aimed at assessing whether participation in the TeLIPro Health Programme  
42  
43 156 can improve HbA<sub>1c</sub> levels through lifestyle changes in people with T2DM in Germany.

### 44 45 157 **Participants**

46  
47  
48 158 For the RCT, 850 participants are currently being recruited from within the members of a  
49  
50 159 German statutory health insurance (Allgemeine Ortskrankenkasse, Rhineland/Hamburg, AOK)  
51  
52 160 via informational letters and reminder telephone calls. Inclusion criteria consist of a T2DM  
53  
54 161 diagnosis (International Statistical Classification of Diseases and Related Health Problems,  
55  
56 162 10th Revision: E11), age between 18 and 67 years, HbA<sub>1c</sub>  $\geq$  6.5%, Body Mass Index (BMI)  $\geq$   
57  
58 163 27 kg/m<sup>2</sup>, and a willingness to participate in the study. Exclusion criteria consist of factors that  
59  
60 164 would prevent successful participation in the programme, e.g., acute infections or chronic

1  
2  
3  
4 165 illnesses, addictions, acute depression, dementia, acute chemotherapy or cortisone therapy, and  
5  
6 166 paralysis. Also excluded are women who are pregnant or breastfeeding as well as individuals  
7  
8 167 who take weight-influencing medication, who have quit smoking in the last 3 months or plan  
9  
10 168 to quit, who have already taken part in a study in the last 6 months, or who have insufficient  
11  
12 169 knowledge of the German language. Recruitment for the TeLIPro trial began in the last quarter  
13  
14 170 of 2018 and is anticipated until December 2019. Participants are being randomised (1:1) into  
15  
16 171 two groups: the intervention group (IG) and the control group (CG).  
17  
18  
19  
20  
21

### 22 173 Intervention Group

23  
24 174 Participants of the IG are given a scale, a step counter, access to a tele-medical online portal, a  
25  
26 175 data hub for transmitting the measured values to the online portal, a glucose meter with test  
27  
28 176 strips for the self-monitoring of blood glucose, and tele-medical telephone coaching from a  
29  
30 177 personal health coach in addition to routine care. For the IG, the measures of blood glucose are  
31  
32 178 recorded continuously, and pedometer data and weight (on a daily or weekly basis) are  
33  
34 179 automatically transmitted to the online portal by the devices. The data can be viewed by both  
35  
36 180 the participant and the coach. If a previously determined target value is exceeded or not  
37  
38 181 reached, an alert is triggered, and the coach may decide to intervene. In addition to the  
39  
40 182 monitoring function, the online portal provides information to support the change in lifestyle  
41  
42 183 and enable participants to manage their illness autonomously. Furthermore, functions are  
43  
44 184 available for communication and information exchange between the actors who are involved:  
45  
46 185 participant and coach, as well as the attending general practitioner (GP) or relatives with the  
47  
48 186 participant's consent. Therefore, it is easy to exchange information and adapt the therapy. The  
49  
50 187 intervention will last 12 months.  
51  
52  
53  
54  
55  
56  
57  
58  
59  
60

### 189 Control Group

1  
2  
3  
4 190 Participants of the CG are not accompanied by a coach. Except for this, they receive the same  
5  
6 191 components of the programme as the IG.  
7

8 192  
9

### 10 193 Outcomes

11  
12 194 The primary outcome may depend on how long the participants have had diabetes. Therefore,  
13  
14  
15 195 the study sample was divided into two subgroups. The primary outcome for participants with  
16  
17 196 a duration of diabetes of  $< 5$  years is remission after a period of 12 months after baseline defined  
18  
19 197 as an HbA<sub>1c</sub> level  $< 6.5\%$ [38]. The hypothesis is that the remission rate 12 months after baseline  
20  
21 198 will be 11% in the IG and 5% in the CG. The primary outcome for participants with a duration  
22  
23 199 of diabetes of  $\geq 5$  years is the HbA<sub>1c</sub> level. It is hypothesised that the HbA<sub>1c</sub> level will be  
24  
25 200 reduced by 0.5% for the IG and 0.2% for the CG 12 months after baseline. The secondary  
26  
27 201 outcomes are cardiovascular risk factors (blood pressure, HDL/LDL cholesterol, total  
28  
29 202 cholesterol, and triglycerides), health-related quality of life, depressive symptoms, eating  
30  
31 203 habits, exercise behaviour, antihyperglycaemic treatment, and blood pressure medication.  
32  
33  
34  
35

36 204

### 37 205 **Data collection**

38  
39 206 After participants are recruited for the TeLIPro trial, they are given detailed information about  
40  
41 207 the programme and provide informed consent. Participants register in the online portal and are  
42  
43 208 asked for sociodemographic factors (sex, age, employment status, education) and the duration  
44  
45 209 of their diabetes. Afterwards, the intervention begins. Participants are given devices and the IG  
46  
47 210 is contacted by the personal health coach. In the online portal, all participants answer  
48  
49 211 questionnaires about their health-related quality of life (Short-Form-Health Survey 12; SF-12),  
50  
51 212 impairment due to depressive symptoms (German version of the Centre for Epidemiological  
52  
53 213 Studies-Depression Scale; CES-D Scale), eating behaviour (German version of the Three-  
54  
55 214 Factor Eating Questionnaire; FEV), and exercise behaviour (Global Physical Activity  
56  
57 215 Questionnaire, GPAQ)[39-42] at baseline, 3 months, 6 months, 9 months, 1 year (completion  
58  
59  
60

1  
2  
3  
4 216 of the intervention), 15 months (follow-up phase), and 18 months (follow-up phase) after  
5  
6 217 baseline. If a questionnaire is not answered within two weeks, participants are reminded by a  
7  
8 218 telephone call from the online portal service staff. A total of up to three telephone calls are  
9  
10 219 attempted, followed by a reminder e-mail. On a quarterly basis, also the attending GP is asked  
11  
12 220 for the participants' HbA<sub>1c</sub> level, weight, BMI, fasting blood glucose, blood pressure,  
13  
14 221 triglycerides, HDL/LDL cholesterol, antihyperglycaemic treatment, and blood pressure  
15  
16 222 medication. Body weight is recorded weekly, and walked steps are recorded daily by the  
17  
18 223 devices for both groups. For the IG, blood glucose is monitored daily.  
19  
20  
21  
22  
23

### 224 225 **Development of the DCE**

226 The first step in developing a DCE is to define the research problem under consideration (e.g.,  
227 measuring patient preferences for tele-medical lifestyle programmes) and to adequately  
228 transfer it into an experimental framework[43–44]. The task comprises the identification and  
229 selection of attributes that reflect all characteristics relevant for a decision in the context of the  
230 research problem. The attributes (e.g., cost or duration of treatment) of the research problem  
231 are further specified by different levels (e.g., cost of \$50 or \$500 and 2, 3, or 4 hours). To  
232 construct an experimental design, the levels of the attributes are systematically varied and  
233 presented in a series of choice sets each with the same number of alternatives (typically two  
234 alternatives). By standard economic theory, it is assumed that individuals will choose the  
235 alternative that maximises their utility. The preference weights for attributes and levels (part-  
236 worth preference weights) constitute the overall utility of an alternative. Thus, observed  
237 choices provide information about the relative weights of preferences for attributes and levels  
238 as well as about the overall utility of each alternative[45]. We are primarily interested in the  
239 preferences of participants who already decided to participate in a tele-medical coaching  
240 programme. Thus, we did not include an opt-out option because respondents have already  
241 chosen to participate in TeLIPro. To identify and select attributes and levels, we followed the

1  
2  
3  
4 242 current literature on the development of DCEs and implemented the following steps: (i)  
5  
6 243 compilation of evidence, (ii) consultation of experts, (iii) consultation of people with diabetes  
7  
8 244 as relevant actors, (iv) pretest, and (v) pilot test[46–47].  
9

10 245

#### 11 12 13 246 Compilation of evidence

14  
15 247 First, we conducted a literature search to identify attributes used in DCEs to elicit preferences  
16  
17 248 regarding lifestyle changes, coaching, and devices (see the online supplementary material).  
18  
19 249 Based on the literature search, we summarised attributes regarding how comfortable the  
20  
21 250 devices are to wear, the handling of the devices, the frequency of contact with the GP or the  
22  
23 251 health coach, emotional support during the programme, responsibility for the physical activity  
24  
25 252 schedule or diet schedule, and the time investment. We did not include monetary costs in our  
26  
27 253 summary, because payments for the provision of health care in Germany are normally paid  
28  
29 254 directly by the statutory health insurance, and therefore monetary costs are less relevant than  
30  
31 255 the time investment for preferences regarding tele-medical lifestyle programmes.  
32  
33  
34

35 256

#### 36 37 38 257 Consultation of experts

39  
40 258 Second, we discussed the attributes with health care experts (see acknowledgments) to ensure  
41  
42 259 that the health care perspective, telehealth, and the clinical perspective were incorporated in  
43  
44 260 the DCE. This process leads to a preliminary list of attributes (i) considering any possible  
45  
46 261 attribute thought to be relevant to tele-medical lifestyle programmes for people with T2DM,  
47  
48 262 (ii) including attributes with a special relevance for TeLIPro in order to best adapt patient  
49  
50 263 preferences to the intervention envisaged in the project, and (iii) including those who could be  
51  
52 264 realistically described in the choice scenario and were potentially amenable to change. This  
53  
54 265 resulted in a list of seven attributes with 2-5 levels: the functions and handling of the online  
55  
56 266 portal, the contacts to coach compared to GP contacts, the transfer of knowledge about a  
57  
58 267 healthier lifestyle, emotional support, exercise plan, nutrition plan, and the total time required  
59  
60

1  
2  
3  
4 268 for the programme. This list formed the basis for the DCE design. The alternative attributes:  
5  
6 269 communication between coach and doctors, competence of the coach, total number of contacts  
7  
8 270 to coach, duration of the programme, intensity of the exercise programme, and exercise in  
9  
10 271 groups or individually were used in the pretest.  
11  
12

13 272

14  
15 273 Consultation of people with diabetes/Pretest

16  
17 274 Third, we conducted qualitative interviews in the form of a cognitive pretest with five  
18  
19 275 individuals with diabetes (December 2018 and January 2019). Participants were recruited from  
20  
21 276 the self-help group (n=2) at the German Diabetes Center in Duesseldorf, Germany, and a  
22  
23 277 specialised diabetes care practice (n=3) in Leverkusen, Germany, by email or personal contact.  
24  
25 278 They participated on a voluntary basis and gave written informed consent prior to being  
26  
27 279 included in the study. The interviewers were two researchers from the Institute for Health  
28  
29 30 Services Research and Health Economics. Interviews were conducted face-to-face at the  
30  
31 31 German Diabetes Center, the diabetes care practice, and the participants' homes. All interviews  
32  
33 32 were logged and audiotaped. The individual interviews were conducted in order to ensure that  
34  
35 33 (i) the most important attributes were included in the DCE, (ii) none of the chosen attributes  
36  
37 34 was dominant, (iii) proper levels were appointed to each of the attributes, and (iv) the task and  
38  
39 35 the wording used in the questionnaire were comprehensible and feasible[44–45]. For the  
40  
41 36 qualitative interviews, we developed a guideline based on cognitive pre-testing, including  
42  
43 37 think-aloud methods, demand techniques (understanding individual words), paraphrasing  
44  
45 38 (reproducing tasks), and sorting techniques (attributes were presented to participants on cards,  
46  
47 39 and participants sorted them by personal relevance). In the first part of the interview, we  
48  
49 40 introduced respondents to TeLIPro, and the questionnaire was presented piece by piece. To  
50  
51 41 obtain more insight into how respondents understood the choice task, they were asked to think  
52  
53 42 aloud during the interview. In addition, respondents were told to identify attributes and levels  
54  
55 43 they did not understand or found hard to grasp and to provide suggestions for improvement. In  
56  
57 44  
58  
59 45  
60 46



1  
2  
3  
4 294 the second part, all seven attributes of the DCE were presented on separate paper cards.  
5  
6 295 Respondents were asked whether they could think of any other attributes that were important  
7  
8 296 but had not been included so far. If so, the interviewer wrote these new attributes on blank  
9  
10 297 cards, and respondents were asked what they considered important about these attributes and  
11  
12 298 what kinds of levels of the attribute they could think of. If no more new attributes were  
13  
14 299 mentioned, the additional cards with the six alternative attributes were laid out and explained  
15  
16 300 to the respondents by the interviewer. Next, respondents were asked if they would swap one or  
17  
18 301 more of the six alternative attributes or – if new attributes were mentioned – if they would swap  
19  
20 302 the new attributes with one or more of the seven attributes in the programme. Two researchers  
21  
22 303 reviewed the interviews and adjusted the DCE after an internal discussion. The attribute  
23  
24 304 ‘emotional support’ was swapped with ‘group activities’, which was also modified to include  
25  
26 305 the non-exercise group activities. The attribute ‘frequency of contacts’ was changed to  
27  
28 306 ‘communication between coach and doctors’. It asks if the coach and doctors have contact with  
29  
30 307 each other instead of the patient to doctor and patient to coach ratios. The attribute named “the  
31  
32 308 transfer of knowledge about a healthier lifestyle” was changed to “responsibility for getting  
33  
34 309 acquainted with a healthier lifestyle” The level ‘4 hours per week’ was removed from the  
35  
36 310 attribute ‘total time required’ because it was deemed unrealistic by respondents. The attributes  
37  
38 311 ‘exercise plan’ and ‘nutrition plan’ were merged into ‘responsibility for setting goals to  
39  
40 312 exercise and menu schedule’ because both attributes targeted the domain of autonomy, and the  
41  
42 313 majority of the respondents swapped out one of these attributes. The description of the task  
43  
44 314 concerning the selection of the choice sets was also rephrased to be more precise. This  
45  
46 315 reduction in the number of attributes to six and the number of levels to two to four ensured an  
47  
48 316 efficient design while also allowing the number of choice sets to be limited to a practicable  
49  
50 317 number to prevent a mental burden that was too high for the participants. It was ensured that  
51  
52 318 one combination of levels reproduced the actual TeLIPro health programme.  
53  
54  
55  
56  
57  
58  
59  
60  
319

320 Pilot test

321 Fourth, we presented the revised DCE to the members of the self-help group ( $n=10$ ) at one of  
 322 their monthly meetings. On a pilot test, they answered a paper-pencil version of the DCE  
 323 questionnaire and were asked at the end of the questionnaire if they had any suggestions for  
 324 improvement. On the basis of these results, the attributes and levels as well as their descriptions  
 325 in the questionnaire were not changed. The DCE instructions concerning the selection of the  
 326 choice sets was again rephrased to clarify that the most preferred or least disliked programme  
 327 of the two had to be chosen. The final six attributes with their corresponding levels are shown  
 328 in Table 1.

329  
 330 **Table 1:** Final attributes and corresponding levels included in the DCE

| Attributes                                                       | Descriptions                                                                                                                                                                                                                                                                                                                                                                                                                                   | Levels                                                                                        |
|------------------------------------------------------------------|------------------------------------------------------------------------------------------------------------------------------------------------------------------------------------------------------------------------------------------------------------------------------------------------------------------------------------------------------------------------------------------------------------------------------------------------|-----------------------------------------------------------------------------------------------|
| The functions and handling of the online portal                  | During the coaching programme, you are provided with different devices to measure your weight, your blood glucose, and the steps you have walked. These devices automatically transfer your data to an online portal that you and your coach can access. The range of functions and the handling of the online portal can differ for different programmes. The more functions the online portal offers, the more complex the handling becomes. | Extensive functions and more complex handling<br>Less extensive functions and easier handling |
| Communication between coach and doctors                          | Coaching programmes can differ on the basis of whether your coach and your doctors communicate about your treatment, the programme goals you have set, and your data in the online portal.                                                                                                                                                                                                                                                     | My coach and my doctors do not communicate<br>My coach and my doctors do communicate          |
| Responsibility for getting acquainted with a healthier lifestyle | Coaching programmes can provide you with information about various opportunities for lifestyle changes.                                                                                                                                                                                                                                                                                                                                        | I receive information from my doctor<br>I receive information from my coach                   |

|                                                                |                                                                                                                                                                                                                                                                                                      |                                                                                                |
|----------------------------------------------------------------|------------------------------------------------------------------------------------------------------------------------------------------------------------------------------------------------------------------------------------------------------------------------------------------------------|------------------------------------------------------------------------------------------------|
|                                                                |                                                                                                                                                                                                                                                                                                      | I search for information myself                                                                |
| Group activities                                               | Some coaching programmes contain activities in groups of 10-15 participants each. The activities include sports activities, cooking together, and also the exchanging of experiences by the group members in an online forum.                                                                        | No group activities<br>Group activities                                                        |
| Responsibility for setting goals to exercise and menu schedule | One part of the coaching programme is setting goals to exercise and eat well.                                                                                                                                                                                                                        | My coach sets my goals<br>I set my goals independently<br>My coach and I set my goals together |
| Total time required                                            | Coaching programmes may differ in the amount of time you have to spend on the programme. This includes the time spent fulfilling your movement goals, talking to your coach, changing your diet, and using your devices correctly. The time required for potential group activities is not included. | 12 hours per week<br>10 hours per week<br>8 hours per week<br>6 hours per week                 |

331

### 332 DCE questionnaire design

333 The combination of the attributes in the different scenarios of the DCE and the compilation of  
 334 the scenarios was based on the number and levels of the attributes as well as other content and  
 335 statistical requirements. SAS macros (SAS version 9.4) were used to define the optimal number  
 336 of choice sets[48]. Particular care was taken to ensure that combinations of levels were realistic.  
 337 The number of total choice sets takes respondents' cognitive capacity into account. The  
 338 efficient factorial fractional design ( $D\text{-error}=0.12$ ) consisted of 12 unique choice tasks. To  
 339 control for the reliability of the choices that were made, choice set 7 was repeated as choice set  
 340 13, resulting in a total of 13 choice sets.

341

### 342 Assessment of the DCE

1  
2  
3  
4 343 Initially, respondents are provided with an extensive explanation of the meanings of all  
5  
6 344 attributes and levels as well as information on how to deal with a choice set, accompanied by  
7  
8 345 an example. Afterwards, respondents are told that they need to choose between two lifestyle  
9  
10 346 programmes in the following choice sets. They are told that 13 choice sets are best suited for  
11  
12 347 determining what type of lifestyle programme is preferred. Respondents are told to always  
13  
14 348 choose their personally best-suited or least-rejected lifestyle programme and that there are no  
15  
16 349 right or wrong answers. They are also reminded that they can always opt for a programme with  
17  
18 350 all the features listed. Every choice task is accompanied by the invitation: 'Please select the  
19  
20 351 coaching programme that suits you best'. Then both programmes (Programmes A and B) are  
21  
22 352 presented (see Figure 1) followed by the question: 'Which programme do you prefer? (Please  
23  
24 353 tick the appropriate box)'. Figure 1 presents an example of a choice task as included in the  
25  
26 354 questionnaire. The DCE is measured before the start of the intervention and after 1 year when  
27  
28 355 the intervention has been completed. Data collection for the DCE began in January 2019 and  
29  
30 356 is anticipated to take place until December 2020.

31  
32  
33  
34  
35  
36 357  
37 358 - *Please insert Figure 1 here* -  
38  
39

40 359

#### 41 42 360 **Data analysis**

43  
44 361 To derive the preferences of people with T2DM regarding tele-medical lifestyle programmes  
45  
46 362 (i.e. relative preference weights for attributes and levels), the obtained baseline DCE data will  
47  
48 363 be analysed using a conditional logit model. Preference weights describe the relative strength  
49  
50 364 of each attribute and level in comparison with all other attributes and levels, respectively.  
51  
52 365 Furthermore, the preference weights will be expressed as time equivalents (willingness to  
53  
54 366 invest time) by calculating the trade-off or marginal rates of substitution between attributes and  
55  
56 367 the attribute that focuses on the time required by the programme. Because the IG and CG do  
57  
58 368 not differ at baseline, the analysis is based on the full sample. To investigate differences in  
59  
60

1  
2  
3  
4 369 preferences before and after participation in the programme, the preference weights of  
5  
6 370 unexperienced, naive programme participants and experienced participants will be compared  
7  
8 371 descriptively and analysed using time equivalents. The analysis will be outlined separately for  
9  
10 372 the IG and the CG as experiences during the intervention phase differ substantially.  
11  
12 373 To investigate possible preference heterogeneity, we will conduct a latent class analysis (LCA)  
13  
14 374 using the baseline data (full sample). The number of classes is determined by the Bayesian  
15  
16 375 information criterion as well as an examination of the interpretation of the latent classes. The  
17  
18 376 following covariates will be incorporated into the LCA: sociodemographic factors (sex, age,  
19  
20 377 employment status, and education), disease-related characteristics (HbA<sub>1c</sub> level, duration of  
21  
22 378 diabetes, BMI), exercise behaviour, depressive symptoms, and health-related quality of life.  
23  
24 379 Finally, we will investigate the causal effect of latent classes of preferences at the beginning of  
25  
26 380 the study on programme success at the end of the study. This will be done by means of an LCA  
27  
28 381 with a distal outcome, where programme success is regressed on latent preference classes. This  
29  
30 382 approach will allow us to explore whether programme preferences differ with respect to distal  
31  
32 383 outcomes such as programme success. This type of analysis may lead to additional information  
33  
34 384 about heterogeneity in the (study) population.  
35  
36  
37  
38  
39  
40  
41  
42

### 386 **Patient and Public involvement**

387 Patient involvement during the various stages of the development of the DCE (qualitative  
388 interviews, pilot tests) ensured that the research question relied on the actual preferences of  
389 people with T2DM participating in tele-medical lifestyle programmes.

390

### 391 **ETHICS AND DISSEMINATION**

392 The DCE study has been approved by the ethics committee of the medical faculty of the  
393 Heinrich Heine University committee of the Heinrich-Heine University Duesseldorf,  
394 registration number 2018-242-ProspDEuA, registered on December 6th, 2018. The TeLIPro

1  
2  
3  
4 395 trial is registered at the U. S. National Library of Medicine, registration number NCT03675919,  
5  
6 396 registered on September 15th, 2018. Patient consent to participate was obtained. Data analysis  
7  
8 397 will be done according to the principles of good scientific research on DCEs developed by the  
9  
10 398 International Society for Pharmacoeconomics and Outcome Research (ISPOR). We aim to  
11  
12 399 disseminate our results in peer-reviewed journals and at national and international conferences  
13  
14  
15 400 to interested patient groups and the public.  
16  
17 401  
18  
19 402  
20  
21  
22  
23  
24  
25  
26  
27  
28  
29  
30  
31  
32  
33  
34  
35  
36  
37  
38  
39  
40  
41  
42  
43  
44  
45  
46  
47  
48  
49  
50  
51  
52  
53  
54  
55  
56  
57  
58  
59  
60

## 403 **ACKNOWLEDGEMENTS**

404 We thank the team of the TeLIPro trial: the AOK Rhineland/Hamburg statutory health  
405 insurance (leader of the trial consortium), the German Institute for Telemedicine and Health  
406 Promotion GmbH (DITG), the Private Institute for Applied Care Research GmbH (inav), and  
407 the Association of Statutory Health Insurance Physicians of North Rhine-Westphalia  
408 (cooperation partner). We acknowledged the work of the DITG in programming and  
409 implementing the DCE at the online platform. We thank the diabetes care practice Kaltheuner,  
410 Schultens-Kaltheuner, Hannig, Marenbach, and Leverkusen and their staff for their support.  
411 We also thank the volunteers from the self-help group at the German Diabetes Center in  
412 Duesseldorf, Germany, and the diabetes care practice in Leverkusen, Germany for participation  
413 in this study.

## 415 **AUTHOR STATEMENT**

416 MV and AI contributed to the initial grant application. All authors contributed to the design of  
417 the study and are involved in the implementation of the project. JS wrote the first draft of the  
418 protocol. JS, JD, SG, VG, MV, MR, and AI contributed to the drafting and editing of the  
419 protocol. All authors read and approved the final protocol.

## 421 **FUNDING**

422 This work was supported by the Innovation Fund coordinated by the Innovation Committee of  
423 the Federal Joint Committee (funding period 2018 - 2021) grant number 01NVF17033 under  
424 the consortium leadership of the AOK Rhineland/Hamburg.

## 426 **CONFLICTS OF INTEREST**

427 The authors declare that they have no competing interests.

1  
2  
3  
4 428  
5

6 429 **DATA STATEMENT**  
7

8  
9 430 After the data are collected and the results are published, the data will be made available upon  
10  
11 431 reasonable request.  
12

13  
14 432  
15

16 433 **SUPPLEMENTARY MATERIAL**  
17

18  
19 434 Results of the literature review to identify attributes used in DCEs to elicit preferences  
20  
21 435 regarding lifestyle changes, coaching, and devices.  
22  
23  
24  
25  
26  
27  
28  
29  
30  
31  
32  
33  
34  
35  
36  
37  
38  
39  
40  
41  
42  
43  
44  
45  
46  
47  
48  
49  
50  
51  
52  
53  
54  
55  
56  
57  
58  
59  
60



436 **REFERENCES**

- 437 1 Cho NH, Shaw JE, Karuranga S, et al. IDF Diabetes Atlas: Global estimates of diabetes  
438 prevalence for 2017 and projections for 2045. *Diabetes Res Clin Pract* 2018;138:271–81.  
439 doi:10.1016/j.diabres.2018.02.023
- 440 2 International Diabetes Federation. IDF Diabetes Atlas, 9th ed. Brussels: International  
441 Diabetes Federation, 2019.
- 442 3 Icks A. Gesundheitsökonomische Aspekte des Diabetes. Deutscher Gesundheitsbericht.  
443 Diabetes: Die Bestandsaufnahme, Mainz, Germany: Kirchheim Verlag, 2015.
- 444 4 Cradock KA, ÓLaighin G, Finucane FM, et al. Diet Behavior Change Techniques in Type  
445 2 Diabetes: A Systematic Review and Meta-analysis. *Diabetes Care* 2017;40:1800–10.  
446 doi:10.2337/dc17-0462
- 447 5 Greaves CJ, Sheppard KE, Abraham C, et al. Systematic review of reviews of intervention  
448 components associated with increased effectiveness in dietary and physical activity  
449 interventions. *BMC Public Health* 2011;11:119. doi:10.1186/1471-2458-11-119
- 450 6 Lim EL, Hollingsworth KG, Aribisala BS, et al. Reversal of type 2 diabetes: normalisation  
451 of beta cell function in association with decreased pancreas and liver triacylglycerol.  
452 *Diabetologia* 2011;54:2506–14. doi:10.1007/s00125-011-2204-7
- 453 7 Steven S, Taylor R. Restoring normoglycaemia by use of a very low calorie diet in long-  
454 and short-duration Type 2 diabetes. *Diabetic Med* 2015;32:1149–55.  
455 doi:10.1111/dme.12722
- 456 8 Umpierre D, Ribeiro PAB, Kramer CK, et al. Physical activity advice only or structured  
457 exercise training and association with HbA<sub>1c</sub> levels in type 2 diabetes: a systematic review  
458 and meta-analysis. *JAMA* 2011;305:1790–9. doi:10.1001/jama.2011.576
- 459 9 American Diabetes Association. 4. Lifestyle management: Standards of Medical Care in  
460 Diabetes—2018. *Diabetes Care* 2018;41(Suppl 1):P38–P50. doi:10.2337/dc18-S004

- 1  
2  
3  
4 461 10 International Diabetes Federation. Clinical Guidelines Task Force. Global guideline for  
5  
6 462 type 2 diabetes. Brussels: International Diabetes Federation, 2012.
- 7  
8 463 11 Paulweber B, Valensi P, Lindström J, et al. A European evidence-based guideline for the  
9  
10 464 prevention of type 2 diabetes. *Horm Metab Res* 2010;42(Suppl 1):P3. doi:10.1055/s-0029-  
11  
12 465 1240928
- 13  
14  
15 466 12 Wing R, Goldstein MG, Acton KJ, et al. Behavioral science research in diabetes: lifestyle  
16  
17 467 changes related to obesity, eating behavior, and physical activity. *Diabetes Care*  
18  
19 468 2001;24:117–23. doi:10.2337/diacare.24.1.117
- 20  
21  
22 469 13 Bollyky JB, Bravata D, Yang J, et al. Remote Lifestyle Coaching Plus a Connected  
23  
24 470 Glucose Meter with Certified Diabetes Educator Support Improves Glucose and Weight  
25  
26 471 Loss for People with Type 2 Diabetes. *J Diabetes Res* 2018:3961730.  
27  
28 472 doi:10.1155/2018/3961730
- 29  
30  
31 473 14 Kempf K, Altpeter B, Berger J, et al. Efficacy of the Tele-medical Lifestyle intervention  
32  
33 474 Program TeLIPro in Advanced Stages of Type 2 Diabetes: A Randomized Controlled  
34  
35 475 Trial. *Diabetes Care* 2017;40:863–71. doi:10.2337/dc17-0303
- 36  
37  
38 476 15 Kumar S, Moseson H, Uppal J, et al. A Diabetes Mobile App With In-App Coaching From  
39  
40 477 a Certified Diabetes Educator Reduces A1C for Individuals With Type 2 Diabetes.  
41  
42 478 *Diabetes Educ* 2018;44:226–36. doi:10.1177/0145721718765650
- 43  
44  
45 479 16 Wayne N, Perez DF, Kaplan DM, et al. Health Coaching Reduces HbA<sub>1c</sub> in Type 2  
46  
47 480 Diabetic Patients From a Lower-Socioeconomic Status Community: A Randomized  
48  
49 481 Controlled Trial. *J Med Internet Res* 2015;17:e224. doi:10.2196/jmir.4871
- 50  
51  
52 482 17 Cahn A, Akirov A, Raz I. Digital health technology and diabetes management. *J Diabetes*  
53  
54 483 2018;10:10–7. doi:10.1111/1753-0407.12606
- 55  
56 484 18 Hood M, Wilson R, Corsica J, et al. What do we know about mobile applications for  
57  
58 485 diabetes self-management? A review of reviews. *J Behav Med* 2016;39:981–94.  
59  
60 486 doi:10.1007/s10865-016-9765-3

- 1  
2  
3  
4 487 19 Hunt CW. Technology and diabetes self-management: An integrative review. *World J*  
5  
6 488 *Diabetes* 2015;6:225–33. doi:10.4239/wjd.v6.i2.225  
7  
8 489 20 Scholl I, Zill JM, Härter M, et al. An integrative model of patient-centeredness - a  
9  
10 490 systematic review and concept analysis. *PLoS ONE* 2014;9:e107828.  
11  
12 491 doi:10.1371/journal.pone.0107828  
13  
14  
15 492 21 Swift JK, Callahan JL. The impact of client treatment preferences on outcome: a meta-  
16  
17 493 analysis. *J Clin Psychol* 2009;65:368–81. doi:10.1002/jclp.20553  
18  
19 494 22 Hauber AB, Han S, Yang J-C, et al. Effect of pill burden on dosing preferences,  
20  
21 495 willingness to pay, and likely adherence among patients with type 2 diabetes. *Patient*  
22  
23 496 *Prefer Adherence* 2013;7:937–49. doi:10.2147/PPA.S43465  
24  
25  
26 497 23 Hauber AB, Mohamed AF, Johnson FR, et al. Treatment preferences and medication  
27  
28 498 adherence of people with Type 2 diabetes using oral glucose-lowering agents. *Diabet Med*  
29  
30 499 2009;26:416–24. doi:10.1111/j.1464-5491.2009.02696.x  
31  
32  
33 500 24 Jan S, Usherwood T, Brien JA, et al. What determines adherence to treatment in  
34  
35 501 cardiovascular disease prevention? Protocol for a mixed methods preference study. *BMJ*  
36  
37 502 *Open* 2011;1:e000372. doi:10.1136/bmjopen-2011-000372  
38  
39  
40 503 25 Walker RC, Morton RL, Tong A, et al. Patient and caregiver preferences for home dialysis  
41  
42 504 —the home first study: a protocol for qualitative interviews and discrete choice  
43  
44 505 experiments. *BMJ Open* 2015;5:e007405. doi:10.1136/bmjopen-2014-007405  
45  
46  
47 506 26 Spinks J, Chaboyer W, Bucknall T, et al. Patient and nurse preferences for nurse  
48  
49 507 handover—using preferences to inform policy: a discrete choice experiment protocol. *BMJ*  
50  
51 508 *Open* 2015;5:e008941. doi:10.1136/bmjopen-2015-008941  
52  
53  
54 509 27 Wong SF, Norman R, Dunning TL, et al. A protocol for a discrete choice experiment:  
55  
56 510 understanding preferences of patients with cancer towards their cancer care across  
57  
58 511 metropolitan and rural regions in Australia. *BMJ Open* 2014;4:e006661.  
59  
60 512 doi:10.1136/bmjopen-2014-006661

- 1  
2  
3  
4 513 28 Quaife M, Eakle R, Cabrera M, et al. Preferences for ARV-based HIV prevention methods  
5  
6 514 among men and women, adolescent girls and female sex workers in Gauteng Province,  
7  
8 515 South Africa: a protocol for a discrete choice experiment. *BMJ Open* 2016;6:e010682.  
9  
10 516 doi:10.1136/bmjopen-2015-010682  
11  
12 517 29 Flood EM, Bell KF, de La Cruz MC, et al. Patient preferences for diabetes treatment  
13  
14 518 attributes and drug classes. *Curr Med Res Opin* 2017;33:261–8.  
15  
16 519 doi:10.1080/03007995.2016.1253553  
17  
18 520 30 Janssen EM, Longo DR, Bardsley JK, et al. Education and patient preferences for treating  
19  
20 521 type 2 diabetes: a stratified discrete-choice experiment. *Patient Prefer Adherence*  
21  
22 522 2017;11:1729–36. doi:10.2147/PPA.S139471  
23  
24 523 31 Jendle J, Torffvit O, Ridderstråle M, et al. Willingness to pay for health improvements  
25  
26 524 associated with anti-diabetes treatments for people with type 2 diabetes. *Curr Med Res*  
27  
28 525 *Opin* 2010;26:917–23. doi:10.1185/03007991003657867  
29  
30 526 32 Joy SM, Little E, Maruthur NM, et al. Patient preferences for the treatment of type 2  
31  
32 527 diabetes: a scoping review. *Pharmacoeconomics* 2013;31:877–92. doi:10.1007/s40273-  
33  
34 528 013-0089-7  
35  
36 529 33 Mühlbacher A, Bethge S. What matters in type 2 diabetes mellitus oral treatment? A  
37  
38 530 discrete choice experiment to evaluate patient preferences. *Eur J Health Econ*  
39  
40 531 2016;17:1125–40. doi:10.1007/s10198-015-0750-5  
41  
42 532 34 Salampessy BH, Veldwijk J, Jantine Schuit A, et al. The Predictive Value of Discrete  
43  
44 533 Choice Experiments in Public Health: An Exploratory Application. *Patient* 2015;8:521–  
45  
46 534 9. doi:10.1007/s40271-015-0115-2  
47  
48 535 35 Veldwijk J, Lambooi MS, van Gils PF, et al. Type 2 diabetes patients' preferences and  
49  
50 536 willingness to pay for lifestyle programs: a discrete choice experiment. *BMC Public*  
51  
52 537 *Health* 2013;13:1099. doi:10.1186/1471-2458-13-1099  
53  
54  
55  
56  
57  
58  
59  
60

- 1  
2  
3  
4 538 36 Wanders JOP, Veldwijk J, de Wit GA, et al. The effect of out-of-pocket costs and financial  
5  
6 539 rewards in a discrete choice experiment: an application to lifestyle programs. *BMC Public*  
7  
8 540 *Health* 2014;14:870. doi:10.1186/1471-2458-14-870  
9  
10 541 37 TeLIPro – Aktiv mit Diabetes. 2019. Retrieved from <https://www.telipro-aok.de/>  
11  
12 542 accessed December 2019.  
13  
14  
15 543 38 Lean MEJ, Leslie WS, Brosnahan N; et al. Primary care-led weight management for  
16  
17 544 remission of type 2 diabetes (DiRECT) an open-label, cluster-randomised trial. *Lancet*  
18  
19 545 2018;391:541–51. doi:10.1016/S0140-6736(17)33102-1  
20  
21  
22 546 39 Gandek B, Ware JE, Aaronson NK, et al. Cross-validation of item selection and scoring  
23  
24 547 for the SF-12 Health Survey in nine countries: results from the IQOLA Project.  
25  
26 548 International Quality of Life Assessment. *J Clin Epidemiol* 1998;51:1171–8.  
27  
28 549 doi:10.1016/S0895-4356(98)00109-7  
29  
30  
31 550 40 Hautzinger M, Bailer M. Allgemeine Depressionsskala (ADS), Weinheim, Germany:  
32  
33 551 Beltz, 1993.  
34  
35  
36 552 41 Stunkard AJ, Messick S. The Three-Factor Eating Questionnaire to measure dietary  
37  
38 553 restraint, disinhibition and hunger. *J Psychosom Res* 1985;29:71–83. doi:10.1016/0022-  
39  
40 554 3999(85)90010-8  
41  
42  
43 555 42 Armstrong T, Bull F. Development of the World Health Organization Global Physical  
44  
45 556 Activity Questionnaire (GPAQ) *J Public Health* 2006;14:66. doi:10.1007/s10389-006-  
46  
47 557 0024-x  
48  
49  
50 558 43 Mühlbacher A, Johnson R. Choice experiments to quantify preferences for health and  
51  
52 559 healthcare: state of the practice. *Appl Health Econ Health Policy* 2016;14:253-66.  
53  
54 560 doi:10.1007/s40258-016-0232-7  
55  
56  
57 561 44 Lancsar E, Louviere J. Conducting Discrete Choice Experiments to Inform Healthcare  
58  
59 562 Decision Making. *Pharmacoeconomics* 2008;26:661–77. doi:10.2165/00019053-  
60  
563 200826080-00004

- 1  
2  
3  
4 564 45 Janssen EM, Segal JB, Bridges JFP. A Framework for Instrument Development of a  
5  
6 565 Choice Experiment: An Application to Type 2 Diabetes. *Patient* 2016;9:465–79.  
7  
8 566 doi:10.1007/s40271-016-0170-3  
9  
10 567 46 Janssen EM, Bridges JFP. Art and Science of Instrument Development for Stated-  
11  
12 568 Preference Methods. *Patient* 2017;10:377–9. doi:10.1007/s40271-017-0261-9  
13  
14  
15 569 47 Janssen EM, Hauber AB, Bridges JFP. Conducting a Discrete-Choice Experiment Study  
16  
17 570 Following Recommendations for Good Research Practices: An Application for Eliciting  
18  
19 571 Patient Preferences for Diabetes Treatments. *Value Health* 2018;21:59–68.  
20  
21 572 doi:10.1016/j.jval.2017.07.001  
22  
23  
24 573 48 Kuhfeld, Warren F. Marketing research methods in SAS: experimental design, choice,  
25  
26 574 conjoint, and graphical techniques. SAS Document TS-694.[http://support.sas.](http://support.sas.com/techsup/tech_note/ts694.pdf)  
27  
28 575 [com/techsup/tech\\_note/ts694.pdf](http://support.sas.com/techsup/tech_note/ts694.pdf). Accessed on March 2, 2007.  
29  
30  
31  
32  
33  
34  
35  
36  
37  
38  
39  
40  
41  
42  
43  
44  
45  
46  
47  
48  
49  
50  
51  
52  
53  
54  
55  
56  
57  
58  
59  
60

**Figure 1:** Example of a choice task used in the discrete choice experiment**First Choice**

Please select the coaching programme that suits you best.

|                                                                             | <b>Programme A</b>                                | <b>Programme B</b>                            |
|-----------------------------------------------------------------------------|---------------------------------------------------|-----------------------------------------------|
| <b>The functions and handling of the online portal</b>                      | <b>Extensive and complex</b>                      | <b>Less extensive and simple</b>              |
| <b>Communication between coach and doctors</b>                              | My coach and my doctors <b>do not</b> communicate | My coach and my doctors <b>do</b> communicate |
| <b>Responsibility for getting acquainted with a healthier lifestyle</b>     | I receive information from my <b>doctor</b>       | I receive information from my <b>coach</b>    |
| <b>Group activities</b>                                                     | No group activities                               | Group activities                              |
| <b>Responsibility for the goals of the exercise and menu schedule</b>       | <b>My coach sets my goals</b>                     | <b>I set my goals independently</b>           |
| <b>Total time required</b>                                                  | <b>10</b> hours per week                          | <b>8</b> hours per week                       |
| <b>Which programme do you prefer?<br/>(Please tick the appropriate box)</b> | <input type="checkbox"/>                          | <input type="checkbox"/>                      |

## Supplementary File

Results of the literature review to identify attributes used in DCEs to elicit preferences regarding lifestyle changes, coaching, and devices.

| DCE Topic | Attribute                      | Levels                                                                                                                                                                                                                                                                                                                    | Reference                                         |
|-----------|--------------------------------|---------------------------------------------------------------------------------------------------------------------------------------------------------------------------------------------------------------------------------------------------------------------------------------------------------------------------|---------------------------------------------------|
| Devices   | Comfort of wearing             | <ul style="list-style-type: none"> <li>- Warm and squeezing</li> <li>- Breathing and not squeezing</li> <li>- Comfortable</li> <li>- Uncomfortable</li> </ul>                                                                                                                                                             | Bouman et al.,2016 [1]<br>Bunge et al., 2010 [2]  |
| Devices   | Appearance                     | <ul style="list-style-type: none"> <li>- Thick material and skin colored</li> <li>- Thin material and color of choice</li> <li>- Visible</li> <li>- Not visible</li> </ul>                                                                                                                                                | Bouman et al.,2016 [1]<br>Bunge et al., 2010 [2]  |
| Devices   | Help Needed                    | <ul style="list-style-type: none"> <li>- Help needed</li> <li>- Independently</li> <li>- No help needed while emptying your bowels</li> <li>- You need less help than you did previously</li> <li>- You need as much help as you did previously</li> <li>- You need more help than you did previously</li> </ul>          | Bouman et al.,2016 [1]<br>Nafees et al.,2016 [3]  |
| Devices   | Duration of therapy            | <ul style="list-style-type: none"> <li>- 6 months</li> <li>- 15 months</li> <li>- 24 months</li> </ul>                                                                                                                                                                                                                    | Bouman et al.,2016 [1]                            |
| Devices   | Device Hygiene                 | <ul style="list-style-type: none"> <li>- Hand washed, dries slowly</li> <li>- Machine washed, dries quickly</li> <li>- Mouthpiece can be washed, but not replaced</li> <li>- Mouthpiece can be replaced, but not washed</li> <li>- Mouthpiece can be cleaned with a dry cloth, but not washed or replaced</li> </ul>      | Bouman et al.,2016 [1]<br>Hawken et al.,2017 [4]  |
| Devices   | Easy to Use                    | <ul style="list-style-type: none"> <li>- 1 step</li> <li>- 2 to 3 steps</li> <li>- More than 4 steps</li> <li>- You will use an automatic pump (process requiring ~15 steps)</li> <li>- You will use a manual pump (process requiring ~30 steps)</li> </ul>                                                               | Hawken et al.,2017 [4]<br>Nafees et al.,2016 [3]  |
| Devices   | Flexibility of device handling | <ul style="list-style-type: none"> <li>- Inhaler can be held in any position throughout inhalation process</li> <li>- Inhaler must be held in certain position throughout inhalation process</li> </ul>                                                                                                                   | Hawken et al.,2017 [4]                            |
| Devices   | Time to use per treatment      | <ul style="list-style-type: none"> <li>- 5 minutes</li> <li>- 10 minutes</li> <li>- 15 minutes</li> <li>- 25 minutes</li> <li>- 30 minutes</li> <li>- You will spend up to 30 minutes</li> <li>- You will spend up to 1 hour</li> <li>- You will spend up to 1.5 hours</li> <li>- You will spend up to 2 hours</li> </ul> | Mohamed et al.,2015 [5]<br>Nafees et al.,2016 [3] |



| DCE Topic             | Attribute                                                             | Levels                                                                                                                                                                                                                                                                                                                                                                                                                                                                                                                                       | Reference                                                                                               |
|-----------------------|-----------------------------------------------------------------------|----------------------------------------------------------------------------------------------------------------------------------------------------------------------------------------------------------------------------------------------------------------------------------------------------------------------------------------------------------------------------------------------------------------------------------------------------------------------------------------------------------------------------------------------|---------------------------------------------------------------------------------------------------------|
| Devices<br>(Coaching) | Frequency of use                                                      | <ul style="list-style-type: none"> <li>- None</li> <li>- 2 pills 3 times a day (6 pills per day)</li> <li>- 3 pills 4 times a day (12 pills per day)</li> <li>- 2 times per day</li> <li>- 3 times per day</li> <li>- Once every two days on average</li> <li>- Once every day on average</li> <li>- Twice a day on average</li> <li>- Three times a day on average</li> <li>- Once per day</li> <li>- Once per week</li> <li>- Once per month</li> <li>- Once per 3 months</li> <li>- Once per 6 months</li> <li>- Once per year</li> </ul> | Marshall et al.,2017 [6]<br>Mohamed et al.,2015 [5]<br>Nafees et al.,2016 [3]<br>Quaife et al.,2016 [7] |
| Coaching              | Training of the IP<br>(information provider)                          | <ul style="list-style-type: none"> <li>- Counselor with specialized training in use of medications during pregnancy only</li> <li>- Family doctor with general health training</li> </ul>                                                                                                                                                                                                                                                                                                                                                    | Hancock-Howard et al.,2012 [8]                                                                          |
| Coaching              | Method of counseling<br>and waiting time                              | <ul style="list-style-type: none"> <li>- Make an appointment and meet with the IP in person in 3 days</li> <li>- Call a telephone service and receive the information within 30-minutes</li> </ul>                                                                                                                                                                                                                                                                                                                                           | Hancock-Howard et al.,2012 [8]                                                                          |
| Coaching              | Knowing the IP                                                        | <ul style="list-style-type: none"> <li>- You have met the IP before and they know your medical history</li> <li>- You have never met the IP</li> </ul>                                                                                                                                                                                                                                                                                                                                                                                       | Hancock-Howard et al.,2012 [8]                                                                          |
| Coaching              | Confidence in the<br>skills of the IP                                 | <ul style="list-style-type: none"> <li>- You have confidence in the skills of the IP</li> <li>- You know nothing about the skills of the IP</li> </ul>                                                                                                                                                                                                                                                                                                                                                                                       | Hancock-Howard et al.,2012 [8]                                                                          |
| Coaching              | Helpfulness of<br>information                                         | <ul style="list-style-type: none"> <li>- Enough information has been provided that you believe your question has been answered to your satisfaction</li> <li>- Some information has been provided to you, but your question has not been completely answered to your satisfaction</li> </ul>                                                                                                                                                                                                                                                 | Hancock-Howard et al.,2012 [8]                                                                          |
| Coaching              | Time away from<br>home/office/usual<br>activities<br>including travel | <ul style="list-style-type: none"> <li>- More than four hours</li> <li>- 3–4 h</li> <li>- 1–2 h</li> </ul>                                                                                                                                                                                                                                                                                                                                                                                                                                   | Spinks et al.,2016 [9]                                                                                  |
| Coaching              | Wait time to get result                                               | <ul style="list-style-type: none"> <li>- Up to three days</li> <li>- Up to one day</li> <li>- Less than four hours</li> </ul>                                                                                                                                                                                                                                                                                                                                                                                                                | Spinks et al.,2016 [9]                                                                                  |
| Coaching              | Who reviews the result                                                | <ul style="list-style-type: none"> <li>- GP</li> <li>- Telederm dermatologist</li> </ul>                                                                                                                                                                                                                                                                                                                                                                                                                                                     | Spinks et al.,2016 [9]                                                                                  |
| Coaching<br>Diabetes  | Feedback on physical<br>activity performance                          | <ul style="list-style-type: none"> <li>- Patient receives feedback on his or her individual performance</li> <li>- Patient's performance is compared with that of other patients</li> </ul>                                                                                                                                                                                                                                                                                                                                                  | Ramirez et al.,2016 [10]                                                                                |
| Coaching<br>Diabetes  | Physical activity<br>behavior-change<br>education                     | <ul style="list-style-type: none"> <li>- Patient's doctor recommends the educational content</li> <li>- Patient specifies the type of educational content he or she wants to receive</li> </ul>                                                                                                                                                                                                                                                                                                                                              | Ramirez et al.,2016 [10]                                                                                |
| Coaching<br>Diabetes  | Frequency of messaging                                                | <ul style="list-style-type: none"> <li>- Patient's doctor recommends how often patient should receive messages</li> <li>- Patient specifies how often he or she wants to receive messages</li> </ul>                                                                                                                                                                                                                                                                                                                                         | Ramirez et al.,2016 [10]                                                                                |

| DCE Topic          | Attribute                  | Levels                                                                                                                                                                                                                                                                                                                                                                                                                                                                                                                                                                                                                                                                                                                                                                                                                                                                                                                                                                                                                                                                                                                                                                     | Reference                                                                                                                     |
|--------------------|----------------------------|----------------------------------------------------------------------------------------------------------------------------------------------------------------------------------------------------------------------------------------------------------------------------------------------------------------------------------------------------------------------------------------------------------------------------------------------------------------------------------------------------------------------------------------------------------------------------------------------------------------------------------------------------------------------------------------------------------------------------------------------------------------------------------------------------------------------------------------------------------------------------------------------------------------------------------------------------------------------------------------------------------------------------------------------------------------------------------------------------------------------------------------------------------------------------|-------------------------------------------------------------------------------------------------------------------------------|
| Lifestyle Diabetes | Menu schedule              | <ul style="list-style-type: none"> <li>- <i>Flexible</i> you set your own goals and develop your own menu schedule to reach these goals without the assistance of a lifestyle coach</li> <li>- <i>General</i> your lifestyle coach informs you about health and unhealthy foods, using food information and examples of recipes</li> <li>- <i>Elaborate</i> your lifestyle coach develops a menu schedule that meets your needs and wishes</li> <li>- Flexible: primarily based on the participants' own initiatives and ideas</li> <li>- General: includes general information on a healthy diet and provides example recipes</li> <li>- Elaborate: a patient tailored schedule that is completely prepared by the lifestyle coach</li> <li>- Flexible (you composed this schedule)</li> <li>- General (with information about diet and examples of recipes)</li> <li>- Elaborate (this schedule is composed for you and tailored to your needs)</li> </ul>                                                                                                                                                                                                               | <p>Salampessy et al.,2015 [11]<br/> Veldwijk et al.,2013 [12]<br/> Wanders et al.,2014 [13]</p>                               |
| Lifestyle Diabetes | Physical activity schedule | <ul style="list-style-type: none"> <li>- Patient's doctor recommends physical activity goals</li> <li>- Patient selects his or her own personalized physical activity goals</li> <li>- <i>Flexible</i> you set your own goals and develop your own activity schedule to reach these goals without the assistance of a lifestyle coach</li> <li>- <i>General</i> your lifestyle coach informs you about what physical activities would be good for you, using information about physical activity and examples of exercises</li> <li>- <i>Elaborate</i> your lifestyle coach develops a physical activity schedule that meets your needs and wishes</li> <li>- Flexible: primarily based on the participants' own initiatives and ideas</li> <li>- General: includes general information on PA, and provides example exercises</li> <li>- Elaborate: a patient tailored schedule that is completely prepared by the lifestyle coach</li> <li>- Flexible (you composed this schedule)</li> <li>- General (with information about physical activity and examples of exercises)</li> <li>- Elaborate (this schedule is composed for you and tailored to your needs)</li> </ul> | <p>Ramirez et al.,2016 [10]<br/> Salampessy et al.,2015 [11]<br/> Veldwijk et al.,2013 [12]<br/> Wanders et al.,2014 [13]</p> |

| DCE Topic                   | Attribute                               | Levels                                                                                                                                                                                                                                                                                                                                                                                                                                                                                                                                                                                                                                                                                                                                   | Reference                                                                                                        |
|-----------------------------|-----------------------------------------|------------------------------------------------------------------------------------------------------------------------------------------------------------------------------------------------------------------------------------------------------------------------------------------------------------------------------------------------------------------------------------------------------------------------------------------------------------------------------------------------------------------------------------------------------------------------------------------------------------------------------------------------------------------------------------------------------------------------------------------|------------------------------------------------------------------------------------------------------------------|
| Coaching Lifestyle Diabetes | Consultation Structure / Social support | <ul style="list-style-type: none"> <li>- Family members learn how to offer support</li> <li>- Patient meets other patients so they can support one another</li> <li>- <i>Individual</i> the consultations of the lifestyle program are individually</li> <li>- <i>Consultation 5</i> the consultations of the lifestyle program are in groups of 5 <i>other patients</i></li> <li>- <i>Consultation 10</i> the consultations of the lifestyle program are in groups of 10 <i>other patients</i></li> <li>- Individually</li> <li>- Groups with 5 other T2DM patients</li> <li>- Groups with 10 other T2DM patients</li> <li>- individual</li> <li>- in a group with 5 other people</li> <li>- in a group with 10 other people</li> </ul> | Ramirez et al.,2016 [10]<br>Salampessy et al.,2015 [11]<br>Veldwijk et al.,2013 [12]<br>Wanders et al.,2014 [13] |
| Lifestyle Diabetes          | Time spent on the program               | <ul style="list-style-type: none"> <li>- 2.5 hours per week</li> <li>- 4 hours per week</li> </ul>                                                                                                                                                                                                                                                                                                                                                                                                                                                                                                                                                                                                                                       | Van Gils et al.,2011 [14]                                                                                        |
| Lifestyle Diabetes          | Arrangement physical activity lessons   | <ul style="list-style-type: none"> <li>- Individually with men and women</li> <li>- With people of the same gender</li> </ul>                                                                                                                                                                                                                                                                                                                                                                                                                                                                                                                                                                                                            | Van Gils et al.,2011 [14]                                                                                        |
| Lifestyle Diabetes          | Group activity                          | <ul style="list-style-type: none"> <li>- Only with people without diabetes</li> <li>- Only with other diabetes patients</li> </ul>                                                                                                                                                                                                                                                                                                                                                                                                                                                                                                                                                                                                       | Van Gils et al.,2011 [14]                                                                                        |
| Lifestyle Diabetes          | Sports activity                         | <ul style="list-style-type: none"> <li>- Walking/cycling</li> <li>- Fitness (treadmill, rowing machine, bicycle)</li> </ul>                                                                                                                                                                                                                                                                                                                                                                                                                                                                                                                                                                                                              | Van Gils et al.,2011 [14]                                                                                        |
| Lifestyle Diabetes          | Counseling                              | <ul style="list-style-type: none"> <li>- None</li> <li>- Physical therapist/sports teacher</li> </ul>                                                                                                                                                                                                                                                                                                                                                                                                                                                                                                                                                                                                                                    | Van Gils et al.,2011 [14]                                                                                        |

### References of supplementary material

- [1] Bouman AC, Cate-Hoek AJ ten, Dirksen CD, et al. Eliciting patients' preferences for elastic compression stocking therapy after deep vein thrombosis: potential for improving compliance. *J Thromb Haemost* 2016;14:510–7. doi:10.1111/jth.13228
- [2] Bunge EM, Bekker-Grob EW de, van Biezen FC, et al. Patients' preferences for scoliosis brace treatment: a discrete choice experiment. *Spine* 2010;35:57–63. doi:10.1097/BRS.0b013e3181bdeaa6
- [3] Nafees B, Lloyd AJ, Ballinger RS, et al. Managing neurogenic bowel dysfunction: what do patients prefer? A discrete choice experiment of patient preferences for transanal irrigation and standard bowel management. *Patient Prefer Adherence* 2016;10:195–204. doi:10.2147/PPA.S96082
- [4] Hawken N, Torvinen S, Neine M-E, et al. Patient preferences for dry powder inhaler attributes in asthma and chronic obstructive pulmonary disease in France: a discrete choice experiment. *BMC Pulm Med* 2017;17:99. doi:10.1186/s12890-017-0439-x

- 1  
2  
3  
4 [5] Mohamed AF, Johnson FR, Balp M-M, et al. Preferences and Stated Adherence for  
5 Antibiotic Treatment of Cystic Fibrosis Pseudomonas Infections. *Patient* 2016;9:59–  
6 67. doi:10.1007/s40271-015-0124-1  
7  
8  
9 [6] Marshall T, Pugh A, Fairchild A, et al. Patient Preferences for Device-Aided  
10 Treatments Indicated for Advanced Parkinson Disease. *Value Health* 2017;20:1383–  
11 93. doi:10.1016/j.jval.2017.06.001  
12  
13  
14 [7] Quaife M, Eakle R, Cabrera M, et al. Preferences for ARV-based HIV prevention  
15 methods among men and women, adolescent girls and female sex workers in Gauteng  
16 Province, South Africa: a protocol for a discrete choice experiment. *BMJ Open*  
17 2016;6:e010682. doi:10.1136/bmjopen-2015-010682  
18  
19 [8] Hancock-Howard RL, Ungar WJ, Marshall D, et al. Public preferences for counseling  
20 regarding antidepressant use during pregnancy: a discrete choice experiment. *Birth*  
21 *Defects Res Part A Clin Mol Teratol* 2012;94:532–9. doi:10.1002/bdra.23042  
22  
23 [9] Spinks J, Janda M, Soyer HP, et al. Consumer preferences for teledermoscopy  
24 screening to detect melanoma early. *J Telemed Telecare* 2016;22:39–46.  
25 doi:10.1177/1357633X15586701  
26  
27 [10] Ramirez M, Wu S, Beale E. Designing a Text Messaging Intervention to Improve  
28 Physical Activity Behavior Among Low-Income Latino Patients With Diabetes: A  
29 Discrete-Choice Experiment, Los Angeles, 2014-2015. *Prev Chronic Dis*  
30 2016;13:E171. doi:10.5888/pcd13.160035  
31  
32 [11] Salampessy BH, Veldwijk J, Jantine Schuit A, et al. The Predictive Value of Discrete  
33 Choice Experiments in Public Health: An Exploratory Application. *Patient*  
34 2015;8:521–9. doi:10.1007/s40271-015-0115-2  
35  
36 [12] Veldwijk J, Lambooi MS, van Gils PF, et al. Type 2 diabetes patients' preferences  
37 and willingness to pay for lifestyle programs: a discrete choice experiment. *BMC*  
38 *Public Health* 2013;13:1099. doi:10.1186/1471-2458-13-1099  
39  
40 [13] Wanders JOP, Veldwijk J, Wit GA de, et al. The effect of out-of-pocket costs and  
41 financial rewards in a discrete choice experiment: an application to lifestyle programs.  
42 *BMC Public Health* 2014;14:870. doi:10.1186/1471-2458-14-870  
43  
44 [14] van Gils PF, Lambooi MS, Flanderijn MH, et al. Willingness to participate in a  
45 lifestyle intervention program of patients with type 2 diabetes mellitus: a conjoint  
46 analysis. *Patient Prefer Adherence* 2011;5:537–46. doi:10.2147/PPA.S16854  
47  
48  
49  
50  
51  
52  
53  
54  
55  
56  
57  
58  
59  
60

# BMJ Open

## Preferences of people with type 2 diabetes for tele-medical lifestyle programmes in Germany: Protocol of a discrete choice experiment

|                                 |                                                                                                                                                                                                                                                                                                                                                                                                                                                                                                                                                                                                                                                                                                                                                                                                                                                                                                                                                                                                                                                                                                                                                                                                                                                                                                                                                                                                                                                                                                                                                                                                                                                                                                                                                                                                                                                                                                                                                                                                                                                                                                                                                                                                                                                                                                                                                                                                       |
|---------------------------------|-------------------------------------------------------------------------------------------------------------------------------------------------------------------------------------------------------------------------------------------------------------------------------------------------------------------------------------------------------------------------------------------------------------------------------------------------------------------------------------------------------------------------------------------------------------------------------------------------------------------------------------------------------------------------------------------------------------------------------------------------------------------------------------------------------------------------------------------------------------------------------------------------------------------------------------------------------------------------------------------------------------------------------------------------------------------------------------------------------------------------------------------------------------------------------------------------------------------------------------------------------------------------------------------------------------------------------------------------------------------------------------------------------------------------------------------------------------------------------------------------------------------------------------------------------------------------------------------------------------------------------------------------------------------------------------------------------------------------------------------------------------------------------------------------------------------------------------------------------------------------------------------------------------------------------------------------------------------------------------------------------------------------------------------------------------------------------------------------------------------------------------------------------------------------------------------------------------------------------------------------------------------------------------------------------------------------------------------------------------------------------------------------------|
| Journal:                        | <i>BMJ Open</i>                                                                                                                                                                                                                                                                                                                                                                                                                                                                                                                                                                                                                                                                                                                                                                                                                                                                                                                                                                                                                                                                                                                                                                                                                                                                                                                                                                                                                                                                                                                                                                                                                                                                                                                                                                                                                                                                                                                                                                                                                                                                                                                                                                                                                                                                                                                                                                                       |
| Manuscript ID                   | bmjopen-2020-036995.R1                                                                                                                                                                                                                                                                                                                                                                                                                                                                                                                                                                                                                                                                                                                                                                                                                                                                                                                                                                                                                                                                                                                                                                                                                                                                                                                                                                                                                                                                                                                                                                                                                                                                                                                                                                                                                                                                                                                                                                                                                                                                                                                                                                                                                                                                                                                                                                                |
| Article Type:                   | Protocol                                                                                                                                                                                                                                                                                                                                                                                                                                                                                                                                                                                                                                                                                                                                                                                                                                                                                                                                                                                                                                                                                                                                                                                                                                                                                                                                                                                                                                                                                                                                                                                                                                                                                                                                                                                                                                                                                                                                                                                                                                                                                                                                                                                                                                                                                                                                                                                              |
| Date Submitted by the Author:   | 25-Jun-2020                                                                                                                                                                                                                                                                                                                                                                                                                                                                                                                                                                                                                                                                                                                                                                                                                                                                                                                                                                                                                                                                                                                                                                                                                                                                                                                                                                                                                                                                                                                                                                                                                                                                                                                                                                                                                                                                                                                                                                                                                                                                                                                                                                                                                                                                                                                                                                                           |
| Complete List of Authors:       | <p>Sommer, Jana; German Diabetes Center, Leibniz Center for Diabetes Research at the Heinrich Heine University Düsseldorf, Institute for Health Services Research and Health Economics; Heinrich Heine University Düsseldorf, Institute for Health Services Research and Health Economics, Centre for Health and Society, Faculty of Medicine</p> <p>Dyczmons, Jan; German Diabetes Center, Leibniz Center for Diabetes Research at the Heinrich Heine University Düsseldorf, Institute for Health Services Research and Health Economics; Heinrich Heine University Düsseldorf, Institute for Health Services Research and Health Economics, Centre for Health and Society, Faculty of Medicine</p> <p>Grobosch, Sandra; German Diabetes Center, Leibniz Center for Diabetes Research at the Heinrich Heine University Düsseldorf, Institute for Health Services Research and Health Economics; Heinrich Heine University Düsseldorf, Institute for Health Services Research and Health Economics, Centre for Health and Society, Faculty of Medicine</p> <p>Gontscharuk, Veronika; Heinrich Heine University Düsseldorf, Institute for Health Services Research and Health Economics, Centre for Health and Society, Faculty of Medicine; German Diabetes Center, Leibniz Center for Diabetes Research at the Heinrich Heine University Düsseldorf, Institute for Health Services Research and Health Economics</p> <p>Vomhof, Markus; German Diabetes Center, Leibniz Center for Diabetes Research at the Heinrich Heine University Düsseldorf, Institute for Health Services Research and Health Economics; Heinrich Heine University Düsseldorf, Institute for Health Services Research and Health Economics, Centre for Health and Society, Faculty of Medicine</p> <p>Roden, Michael; German Diabetes Center, Leibniz Center for Diabetes Research at the Heinrich Heine University Düsseldorf, Institute for Clinical Diabetology; Heinrich Heine University Düsseldorf, Division of Endocrinology and Diabetology, Faculty of Medicine</p> <p>Icks, Andrea; Heinrich Heine University Düsseldorf, Institute for Health Services Research and Health Economics, Centre for Health and Society, Faculty of Medicine; German Diabetes Center, Leibniz Center for Diabetes Research at the Heinrich Heine University Düsseldorf, Institute for Health Services Research and Health Economics</p> |
| <b>Primary Subject Heading</b>: | Research methods                                                                                                                                                                                                                                                                                                                                                                                                                                                                                                                                                                                                                                                                                                                                                                                                                                                                                                                                                                                                                                                                                                                                                                                                                                                                                                                                                                                                                                                                                                                                                                                                                                                                                                                                                                                                                                                                                                                                                                                                                                                                                                                                                                                                                                                                                                                                                                                      |
| Secondary Subject Heading:      | Research methods, Diabetes and endocrinology, Health economics,                                                                                                                                                                                                                                                                                                                                                                                                                                                                                                                                                                                                                                                                                                                                                                                                                                                                                                                                                                                                                                                                                                                                                                                                                                                                                                                                                                                                                                                                                                                                                                                                                                                                                                                                                                                                                                                                                                                                                                                                                                                                                                                                                                                                                                                                                                                                       |

1  
2  
3  
4  
5  
6  
7  
8  
9  
10  
11  
12  
13  
14  
15  
16  
17  
18  
19  
20  
21  
22  
23  
24  
25  
26  
27  
28  
29  
30  
31  
32  
33  
34  
35  
36  
37  
38  
39  
40  
41  
42  
43  
44  
45  
46  
47  
48  
49  
50  
51  
52  
53  
54  
55  
56  
57  
58  
59  
60

|           |                                                                                                                                                                                                                                                                                       |
|-----------|---------------------------------------------------------------------------------------------------------------------------------------------------------------------------------------------------------------------------------------------------------------------------------------|
|           | Health services research                                                                                                                                                                                                                                                              |
| Keywords: | Telemedicine < BIOTECHNOLOGY & BIOINFORMATICS, STATISTICS & RESEARCH METHODS, Protocols & guidelines < HEALTH SERVICES ADMINISTRATION & MANAGEMENT, Health economics < HEALTH SERVICES ADMINISTRATION & MANAGEMENT, General diabetes < DIABETES & ENDOCRINOLOGY, QUALITATIVE RESEARCH |
|           |                                                                                                                                                                                                                                                                                       |

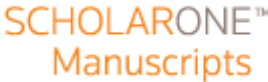



I, the Submitting Author has the right to grant and does grant on behalf of all authors of the Work (as defined in the below author licence), an exclusive licence and/or a non-exclusive licence for contributions from authors who are: i) UK Crown employees; ii) where BMJ has agreed a CC-BY licence shall apply, and/or iii) in accordance with the terms applicable for US Federal Government officers or employees acting as part of their official duties; on a worldwide, perpetual, irrevocable, royalty-free basis to BMJ Publishing Group Ltd ("BMJ") its licensees and where the relevant Journal is co-owned by BMJ to the co-owners of the Journal, to publish the Work in this journal and any other BMJ products and to exploit all rights, as set out in our [licence](#).

The Submitting Author accepts and understands that any supply made under these terms is made by BMJ to the Submitting Author unless you are acting as an employee on behalf of your employer or a postgraduate student of an affiliated institution which is paying any applicable article publishing charge ("APC") for Open Access articles. Where the Submitting Author wishes to make the Work available on an Open Access basis (and intends to pay the relevant APC), the terms of reuse of such Open Access shall be governed by a Creative Commons licence – details of these licences and which [Creative Commons](#) licence will apply to this Work are set out in our licence referred to above.

Other than as permitted in any relevant BMJ Author's Self Archiving Policies, I confirm this Work has not been accepted for publication elsewhere, is not being considered for publication elsewhere and does not duplicate material already published. I confirm all authors consent to publication of this Work and authorise the granting of this licence.

1  
2 1 **Preferences of people with type 2 diabetes for tele-medical lifestyle programmes in**  
3  
4 2 **Germany: Protocol of a discrete choice experiment**

5  
6 3 Jana Sommer<sup>1,2,3</sup> \*, Jan Dyczmons<sup>1,2,3</sup> Sandra Grobosch<sup>1,2,3</sup>, Veronika Gontscharuk<sup>1,2,3</sup>,  
7  
8 4 Markus Vomhof<sup>1,2,3</sup>, Michael Roden<sup>3,4,5</sup>, and Andrea Icks<sup>1,2,3</sup>

9  
10  
11 5  
12  
13 6 <sup>1</sup> Institute for Health Services Research and Health Economics, German Diabetes Center  
14 (DDZ), Leibniz Center for Diabetes Research at the Heinrich Heine University, Auf'm  
15 Hennekamp 65, 40225 Duesseldorf, Germany

16 7  
17  
18 8  
19 9 <sup>2</sup> Institute for Health Services Research and Health Economics, Centre for Health and Society,  
20 Medical Faculty, Heinrich Heine University, Moorenstraße 5, 40225 Duesseldorf, Germany

21 10  
22 11 <sup>3</sup> German Center for Diabetes Research (DZD), Ingolstaedter Landstraße 1, 85764 Neuherberg,  
23 Germany

24 12  
25 13 <sup>4</sup> Institute for Clinical Diabetology, German Diabetes Center (DDZ), Leibniz Center for  
26 Diabetes Research at the Heinrich Heine University, Auf'm Hennekamp 65, 40225  
27 Duesseldorf, Germany

28 14  
29 15 <sup>5</sup> Division of Endocrinology and Diabetology, Medical Faculty, Heinrich Heine University,  
30 Moorenstraße 5, 40225 Duesseldorf, Germany

31 16  
32 17  
33 18  
34 19 \* Corresponding author

35 20 Dr. Jana Sommer \*, jana.sommer@uni-duesseldorf.de, Phone: +49 211 8106503

36 21  
37 22 Word count: 4017; Abstract: 285, Number of figures: 1, Number of tables: 1, Number of  
38 supplementary material: 1



## 24 **ABSTRACT**

### 25 **Introduction**

26 Tele-medical lifestyle programmes for people with type 2 diabetes mellitus (T2DM) provide  
27 an opportunity to develop a healthier lifestyle and consequently to improve health outcomes.  
28 When implementing new programmes into standard care, considering patients' preferences  
29 may increase the success of the participants. This study aims to examine the preferences of  
30 people with T2DM with respect to tele-medical lifestyle programmes, to analyse whether these  
31 preferences predict programme success, and to explore the changes that may occur during a  
32 tele-medical lifestyle intervention.

### 33 **Methods and analysis**

34 We outline the protocol of the development and assessment of a discrete choice experiment  
35 (DCE) to examine patient preferences in a tele-medical lifestyle programme with regard to the  
36 functions of the online portal, communication, responsibilities, group activities, and time  
37 requirements. To develop the design of the DCE, we conducted pilot work involving health  
38 care experts and in particular people with T2DM using cognitive pretesting. The final DCE is  
39 being implemented within a randomised controlled trial (RCT) for investigating whether  
40 participation in a tele-medical lifestyle intervention programme sustainably improves the  
41 HbA<sub>1c</sub> values in 850 members of a large German statutory health insurance with T2DM.  
42 Preferences are being assessed before and after participants complete the programme. The DCE  
43 data will be analysed using regression and latent class analyses (LCAs).

### 44 **Ethics and dissemination**

45 The DCE study has been approved by the ethics committee of the medical faculty of the  
46 Heinrich Heine University Duesseldorf, registration number 2018-242-ProspDEuA, registered  
47 on December 6<sup>th</sup>, 2018. The TeLIPro trial is registered at the U. S. National Library of  
48 Medicine, registration number NCT03675919, registered on September 15<sup>th</sup>, 2018. We aim to

1  
2  
3  
4 49 disseminate our results in peer-reviewed journals, at national and international conferences,  
5  
6 50 and among interested patient groups and the public.  
7  
8  
9

10

### 11 **Strengths and limitations of this study**

- 12  
13 53 • We are using a DCE to assess the preferences of people with T2DM participating in  
14  
15 54 TeLIPro, a tele-medical lifestyle programme, before and after they complete the  
16  
17 55 programme.  
18  
19  
20 56 • Programme preferences may be used to further develop the TeLIPro Health  
21  
22 57 Programme.  
23  
24 58 • DCE data will enable us to retrieve relative preference weights from which we can learn  
25  
26 59 which components of a tele-medical lifestyle programme are most important to the  
27  
28 60 participants.  
29  
30  
31 61 • Since the DCE was developed on the basis of the TeLIPro trial, the transferability of  
32  
33 62 the DCE to other tele-medical lifestyle programmes will be limited.  
34  
35  
36  
37

### 38 **Keywords**

39  
40 65 Patient preferences, discrete choice experiment, lifestyle changes, Type 2 diabetes mellitus,  
41  
42 66 tele-medical coaching, lifestyle intervention, preference elicitation, preference assessment,  
43  
44 67 lifestyle changing programme  
45  
46  
47  
48  
49  
50  
51  
52  
53  
54  
55  
56  
57  
58  
59  
60

## 68 INTRODUCTION

69 The prevalence of diagnosed diabetes in the world is continuously increasing[1]. In 2019, more  
70 than 9.5 million adults were diagnosed with diabetes in Germany, most of them with type 2  
71 diabetes mellitus (T2DM)[2]. Besides antihyperglycemic treatment, an effective T2DM  
72 therapy includes programmes aimed at lifestyle changes, including changes in dietary habits  
73 and improvements in physical activity. Since these programmes have significantly reduced  
74 T2DM participants' haemoglobin A<sub>1c</sub> (HbA<sub>1c</sub>) levels, they may help to reduce the progression  
75 of the disease[3–7]. Thus, lifestyle programmes have been included in clinical guidelines and  
76 international position statements for the treatment of people with T2DM[8–10].

77  
78 Digital health technologies and coaching approaches are playing increasingly important roles  
79 in health care in diabetes[11–17]. Tele-medical health programmes offer up-to-date easy access  
80 and most notably a location-independent way to support patients in managing their diabetes,  
81 using technical aids such as apps, internet platforms, and mobile measurement devices and  
82 often including a personal health coach[11–14]. A proof of concept study showed that  
83 participation in a tele-medical health intervention programme that focused on eating behaviour,  
84 but also included support from a personal health coach, led to significant reductions in HbA<sub>1c</sub>,  
85 weight, blood pressure, and other cardiovascular risk factors in people with T2DM[12].

86  
87 Little is known about the underlying decision-making process regarding the participation and  
88 adherence of the target groups to tele-medical lifestyle programmes. One promising approach  
89 to examine why some people participate and succeed in lifestyle-changing programmes and  
90 others do not is to ask patients about their preferences for these programmes. As one integral  
91 part of the multidimensional concept of patient-centeredness[18], preferences determine which  
92 alternative is most favourably evaluated by patients (e.g., which type of lifestyle programme is  
93 preferred).

94

1  
2  
3  
4  
5  
6 95 Preferences can be determined not only for entire programmes but also for different  
7  
8 96 components that make up a programme (e.g., the duration or intensity of a programme). These  
9  
10 97 components might be evaluated differently by participants. Multi-attribute methods, such as  
11  
12 98 the discrete choice experiment (DCE)[19–21], can help to identify preferred components,  
13  
14 99 which are important for achieving better programme outcomes. To date, studies using a DCE  
15  
16  
17 100 to elicit preferences in people with diabetes have mostly examined preferences regarding  
18  
19 101 treatment[22–26] and lifestyle changes[27–29]. Thus, there remains a need to clarify patients’  
20  
21 102 preferences regarding the relative importance of components with respect to tele-medical  
22  
23 103 lifestyle programmes and coaching approaches (e.g., involvement of the coach, internet  
24  
25 104 platforms, mobile measurement instruments, or type of support). Knowledge of these  
26  
27 105 preferences and the identification of groups of patients with similar preferences may be helpful  
28  
29 106 for identifying new programme participants and for developing new or adapting existing health  
30  
31 107 programmes by designing them in a more tailored and preference-oriented way.  
32  
33  
34  
35  
36  
37

108

38 109 It is also important to ask whether preferences are associated with programme success. A match  
39  
40 110 between the preference for and the content of a programme is likely to improve a participant’s  
41  
42 111 adherence to and willingness to participate in a programme and thus the success of the  
43  
44 112 programme in the form of better outcomes. Studies in which participants were matched to  
45  
46 113 entire lifestyle programmes in accordance with their preferences found significant, albeit small,  
47  
48 114 positive effects on treatment outcomes[30–34]. To the best of our knowledge, associations  
49  
50 115 between preferences for certain components of tele-medical lifestyle programmes and  
51  
52 116 programme success have not been investigated in diabetes care using DCE methodology.  
53  
54 117 Knowledge of which particular components contribute to the success of tele-medical lifestyle  
55  
56 118 programmes may be helpful for modifying programmes accordingly.  
57  
58  
59  
60

119

1  
2  
3  
4 120 Another question that arises is whether participants' preferences change while they are  
5  
6 121 participating in a tele-medical lifestyle programme. In principle, preferences are assumed to be  
7  
8 122 stable[35–37]. However, as expressed preferences depend on individual information and  
9  
10 123 experience, they may change as participants receive more information about the programme  
11  
12 124 and its components during participation. Similar effects have been found for preferences with  
13  
14 125 regard to cancer screening. Detailed information about recommended invasive follow-up  
15  
16 126 testing for individuals at risk had negative effects on individuals' decision to participate in a  
17  
18 127 non-invasive screening[38]. Knowledge of changes in preferences in individuals with diabetes  
19  
20 128 participating in tele-medical lifestyle programmes would be helpful for adapting the  
21  
22 129 components of a programme as it progresses.  
23  
24  
25  
26  
27  
28

### 29 131 **Contribution to the field & Aims**

30  
31 132 With this study, we aim (i) to measure the preferences of people with T2DM regarding tele-  
32  
33 133 medical lifestyle programmes and coaching approaches and to analyse the heterogeneity of  
34  
35 134 these preferences, (ii) to investigate whether preferences predict programme success, and (iii)  
36  
37 135 to compare participants' preferences before and after the intervention.  
38  
39  
40  
41  
42

### 43 137 **METHODS AND ANALYSIS**

44  
45  
46 138 Patient preferences for tele-medical lifestyle programmes and coaching approaches are being  
47  
48 139 elicited with a DCE in individuals who are participating in a randomised-controlled trial (RCT)  
49  
50 140 for testing the effectiveness of the tele-medical lifestyle intervention programme TeLIPro[39].  
51  
52 141 Participants of the RCT are also taking part in the DCE. The DCE uses the infrastructure of the  
53  
54 142 RCT for data collection. However, the DCE does not influence the RCT, the selection of  
55  
56 143 participants, or the randomised assignment of the participants. In the following, we first  
57  
58  
59  
60

1  
2  
3  
4 144 describe the TeLIPro Health Programme briefly. After this, we outline the development of the  
5  
6 145 DCE and its assessment within the RCT.  
7  
8  
9 146

### 10 11 147 **The TeLIPro Health Programme**

12  
13 148 TeLIPro (TeLIPro Health Programme - Active with Diabetes) is a tele-medical lifestyle  
14  
15 149 programme in Germany designed to help people with T2DM implement a healthy lifestyle  
16  
17 150 through patient-centred and personal care[39]. Participants receive tele-medical devices, access  
18  
19 151 to a secured tele-medical online portal, and tele-medical coaching from a personal health coach  
20  
21 152 who supports and accompanies them for the duration of the programme. The programme is  
22  
23 153 intended to improve blood glucose levels and therefore to improve or maintain the health status  
24  
25 154 and the quality of life of the participants in the long-term. Ultimately, this should reduce the  
26  
27 155 risk for concomitant and secondary diseases. The integration of the technology also supports  
28  
29 156 the scalability of the programme, enabling it to meet the individual preferences and needs of  
30  
31 157 the participants.  
32  
33  
34  
35  
36  
37  
38

### 39 159 **Development of the DCE to measure patient preferences**

40  
41 160 To measure preferences, we are employing a DCE, a stated preference method, which is the  
42  
43 161 predominant method for eliciting patient preferences in all fields of health care[40–44]. The  
44  
45 162 DCE methodology – based on the Random Utility Theory – allows researchers to estimate and  
46  
47 163 contrast the relative strengths of preferences across a range of particular attributes. The first  
48  
49 164 step in developing a DCE is to define the research problem under consideration (e.g.,  
50  
51 165 measuring patient preferences for tele-medical lifestyle programmes) and to adequately  
52  
53 166 transfer it into an experimental framework[19–20]. The task comprises the identification and  
54  
55 167 selection of attributes that reflect all characteristics relevant for a decision in the context of the  
56  
57 168 research problem. The attributes (e.g., cost or duration of treatment) of the research problem  
58  
59 169 are further specified by different levels (e.g., cost of \$50 or \$500 and 2, 3, or 4 hours). To  
60

1  
2  
3  
4 170 construct an experimental design, the levels of the attributes are systematically varied and  
5  
6 171 presented in a series of choice sets each with the same number of alternatives (typically two  
7  
8 172 alternatives). By standard economic theory, it is assumed that individuals will choose the  
9  
10 173 alternative that maximises their utility. The preference weights for attributes and levels (part-  
11  
12 174 worth preference weights) constitute the overall utility of an alternative. Thus, observed  
13  
14 175 choices provide information about the relative weights of preferences for attributes and levels  
15  
16 176 as well as about the overall utility of each alternative[45]. We are primarily interested in the  
17  
18 177 preferences of participants who already decided to participate in a tele-medical coaching  
19  
20 178 programme. Thus, we did not include an opt-out option because respondents have already  
21  
22 179 chosen to participate in TeLIPro. To identify and select attributes and levels, we followed the  
23  
24 180 current literature on the development of DCEs and implemented the following steps: (i)  
25  
26 181 compilation of evidence, (ii) consultation of experts, (iii) consultation of people with diabetes  
27  
28 182 as relevant actors, (iv) pretest, and (v) pilot test[46–47].  
29  
30  
31  
32  
33  
34  
35

#### 36 184 Compilation of evidence

37  
38 185 First, we conducted a literature search to identify attributes used in DCEs to elicit preferences  
39  
40 186 regarding lifestyle changes, coaching, and devices (see the online supplementary material).  
41  
42 187 Based on the literature search, we summarised attributes regarding how comfortable the  
43  
44 188 devices are to wear, the handling of the devices, the frequency of contact with the GP or the  
45  
46 189 health coach, emotional support during the programme, responsibility for the physical activity  
47  
48 190 schedule or diet schedule, and the time investment. We did not include monetary costs in our  
49  
50 191 summary, because payments for the provision of health care in Germany are normally paid  
51  
52 192 directly by the statutory health insurance, and therefore monetary costs are less relevant than  
53  
54 193 the time investment for preferences regarding tele-medical lifestyle programmes.  
55  
56  
57  
58  
59  
60

#### 195 Consultation of experts

1  
2  
3  
4 196 Second, we discussed the attributes with health care experts (see acknowledgments) to ensure  
5  
6 197 that the health care perspective, telehealth, and the clinical perspective were incorporated in  
7  
8 198 the DCE. This process leads to a preliminary list of attributes (i) considering any possible  
9  
10 199 attribute thought to be relevant to tele-medical lifestyle programmes for people with T2DM,  
11  
12 200 (ii) including attributes with a special relevance for TeLIPro in order to best adapt patient  
13  
14 201 preferences to the intervention envisaged in the project, and (iii) including those who could be  
15  
16 202 realistically described in the choice scenario and were potentially amenable to change. This  
17  
18 203 resulted in a list of seven attributes with 2-5 levels: the functions and handling of the online  
19  
20 204 portal, the contacts to coach compared to GP contacts, the transfer of knowledge about a  
21  
22 205 healthier lifestyle, emotional support, exercise plan, nutrition plan, and the total time required  
23  
24 206 for the programme. This list formed the basis for the DCE design. The alternative attributes:  
25  
26 207 communication between coach and doctors, competence of the coach, total number of contacts  
27  
28 208 to coach, duration of the programme, intensity of the exercise programme, and exercise in  
29  
30 209 groups or individually were used in the pretest.  
31  
32  
33  
34  
35  
36  
37

#### 38 211 Consultation of people with diabetes/Pretest

39  
40 212 Third, we conducted qualitative interviews in the form of a cognitive pretest with five  
41  
42 213 individuals with diabetes (December 2018 and January 2019). Participants were recruited from  
43  
44 214 the self-help group (n=2) at the German Diabetes Center in Duesseldorf, Germany, and a  
45  
46 215 specialised diabetes care practice (n=3) in Leverkusen, Germany, by email or personal contact.  
47  
48 216 They participated on a voluntary basis and gave written informed consent prior to being  
49  
50 217 included in the study. The interviewers were two researchers from the Institute for Health  
51  
52 218 Services Research and Health Economics. Interviews were conducted face-to-face at the  
53  
54 219 German Diabetes Center, the diabetes care practice, and the participants' homes. All interviews  
55  
56 220 were logged and audiotaped. The individual interviews were conducted in order to ensure that  
57  
58 221 (i) the most important attributes were included in the DCE, (ii) none of the chosen attributes  
59  
60



1  
2  
3  
4 222 was dominant, (iii) proper levels were appointed to each of the attributes, and (iv) the task and  
5  
6 223 the wording used in the questionnaire were comprehensible and feasible[19,45]. For the  
7  
8 224 qualitative interviews, we developed a guideline based on cognitive pre-testing, including  
9  
10 225 think-aloud methods, demand techniques (understanding individual words), paraphrasing  
11  
12 226 (reproducing tasks), and sorting techniques (attributes were presented to participants on cards,  
13  
14  
15 227 and participants sorted them by personal relevance). In the first part of the interview, we  
16  
17 228 introduced respondents to TeLIPro, and the questionnaire was presented piece by piece. To  
18  
19 229 obtain more insight into how respondents understood the choice task, they were asked to think  
20  
21 230 aloud during the interview. In addition, respondents were told to identify attributes and levels  
22  
23 231 they did not understand or found hard to grasp and to provide suggestions for improvement. In  
24  
25 232 the second part, all seven attributes of the DCE were presented on separate paper cards.  
26  
27 233 Respondents were asked whether they could think of any other attributes that were important  
28  
29 234 but had not been included so far. If so, the interviewer wrote these new attributes on blank  
30  
31 235 cards, and respondents were asked what they considered important about these attributes and  
32  
33 236 what kinds of levels of the attribute they could think of. If no more new attributes were  
34  
35 237 mentioned, the additional cards with the six alternative attributes were laid out and explained  
36  
37 238 to the respondents by the interviewer. Next, respondents were asked if they would swap one or  
38  
39 239 more of the six alternative attributes or – if new attributes were mentioned – if they would swap  
40  
41 240 the new attributes with one or more of the seven attributes in the programme. Two researchers  
42  
43 241 reviewed the interviews and adjusted the DCE after an internal discussion. The attribute  
44  
45 242 ‘emotional support’ was swapped with ‘group activities’, which was also modified to include  
46  
47 243 the non-exercise group activities. The attribute ‘frequency of contacts’ was changed to  
48  
49 244 ‘communication between coach and doctors’. It asks if the coach and doctors have contact with  
50  
51 245 each other instead of the patient to doctor and patient to coach ratios. The attribute named “the  
52  
53 246 transfer of knowledge about a healthier lifestyle” was changed to “responsibility for getting  
54  
55 247 acquainted with a healthier lifestyle” The level ‘4 hours per week’ was removed from the  
56  
57  
58  
59  
60

248 attribute ‘total time required’ because it was deemed unrealistic by respondents. The attributes  
 249 ‘exercise plan’ and ‘nutrition plan’ were merged into ‘responsibility for setting goals to  
 250 exercise and menu schedule’ because both attributes targeted the domain of autonomy, and the  
 251 majority of the respondents swapped out one of these attributes. The description of the task  
 252 concerning the selection of the choice sets was also rephrased to be more precise. This  
 253 reduction in the number of attributes to six and the number of levels to two to four ensured an  
 254 efficient design while also allowing the number of choice sets to be limited to a practicable  
 255 number to prevent a mental burden that was too high for the participants. It was ensured that  
 256 one combination of levels reproduced the actual TeLIPro health programme.

#### 258 Pilot test

259 Fourth, we presented the revised DCE to the members of the self-help group ( $n=10$ ) at one of  
 260 their monthly meetings. On a pilot test, they answered a paper-pencil version of the DCE  
 261 questionnaire and were asked at the end of the questionnaire if they had any suggestions for  
 262 improvement. On the basis of these results, the attributes and levels as well as their descriptions  
 263 in the questionnaire were not changed. The DCE instructions concerning the selection of the  
 264 choice sets was again rephrased to clarify that the most preferred or least disliked programme  
 265 of the two had to be chosen. The final six attributes with their corresponding levels are shown  
 266 in Table 1.

268 **Table 1:** Final attributes and corresponding levels included in the DCE

| Attributes                                      | Descriptions                                                                                                                                                                                                                                                          | Levels                                                                                        |
|-------------------------------------------------|-----------------------------------------------------------------------------------------------------------------------------------------------------------------------------------------------------------------------------------------------------------------------|-----------------------------------------------------------------------------------------------|
| The functions and handling of the online portal | During the coaching programme, you are provided with different devices to measure your weight, your blood glucose, and the steps you have walked. These devices automatically transfer your data to an online portal that you and your coach can access. The range of | Extensive functions and more complex handling<br>Less extensive functions and easier handling |

functions and the handling of the online portal can differ for different programmes. The more functions the online portal offers, the more complex the handling becomes.

|                                                                  |                                                                                                                                                                                                                                                                                                      |                                                                                                                |
|------------------------------------------------------------------|------------------------------------------------------------------------------------------------------------------------------------------------------------------------------------------------------------------------------------------------------------------------------------------------------|----------------------------------------------------------------------------------------------------------------|
| Communication between coach and doctors                          | Coaching programmes can differ on the basis of whether your coach and your doctors communicate about your treatment, the programme goals you have set, and your data in the online portal.                                                                                                           | My coach and my doctors do not communicate<br>My coach and my doctors do communicate                           |
| Responsibility for getting acquainted with a healthier lifestyle | Coaching programmes can provide you with information about various opportunities for lifestyle changes.                                                                                                                                                                                              | I receive information from my doctor<br>I receive information from my coach<br>I search for information myself |
| Group activities                                                 | Some coaching programmes contain activities in groups of 10-15 participants each. The activities include sports activities, cooking together, and also the exchanging of experiences by the group members in an online forum.                                                                        | No group activities<br>Group activities                                                                        |
| Responsibility for setting goals to exercise and menu schedule   | One part of the coaching programme is setting goals to exercise and eat well.                                                                                                                                                                                                                        | My coach sets my goals<br>I set my goals independently<br>My coach and I set my goals together                 |
| Total time required                                              | Coaching programmes may differ in the amount of time you have to spend on the programme. This includes the time spent fulfilling your movement goals, talking to your coach, changing your diet, and using your devices correctly. The time required for potential group activities is not included. | 12 hours per week<br>10 hours per week<br>8 hours per week<br>6 hours per week                                 |

269

270 DCE questionnaire design

271 The combination of the attributes in the different scenarios of the DCE and the compilation of

272 the scenarios was based on the number and levels of the attributes as well as other content

1  
2  
3  
4 273 and statistical requirements. SAS macros (SAS version 9.4) were used to define the optimal  
5  
6 274 number of choice sets[48]. Particular care was taken to ensure that combinations of levels  
7  
8 275 were realistic. The number of total choice sets takes respondents' cognitive capacity into  
9  
10 276 account. The efficient factorial fractional design ( $D$ -error=0.12) consisted of 12 unique  
11  
12 277 choice tasks. To control for the reliability of the choices that were made, choice set 7 was  
13  
14  
15 278 repeated as choice set 13, resulting in a total of 13 choice sets.  
16

17 279

### 19 280 **Assessment of the DCE within the RCT**

21 281 The collecting of the DCE data is integrated into the collecting of the RCT data. Therefore,  
22  
23  
24 282 all RCT participants are asked to respond to the DCE. Next, we first describe the RCT, and  
25  
26 283 then we describe the assessment of the DCE.  
27

28 284

### 31 285 **The RCT: The TeLIPro trial**

33 286 The trial is aimed at assessing whether participating in the tele-medical lifestyle programme  
34  
35 287 TeLIPro can improve the HbA<sub>1c</sub> levels of people with T2DM. According to the sample size  
36  
37 288 calculation computed for the RCT, 850 participants were recruited from within the members  
38  
39  
40 289 of a German statutory health insurance (Allgemeine Ortskrankenkasse, Rhineland/Hamburg,  
41  
42 290 AOK) via informational letters and reminder telephone calls. Inclusion criteria consist of a  
43  
44 291 T2DM diagnosis, age between 18 and 67 years, HbA<sub>1c</sub>  $\geq$  6.5%, Body Mass Index (BMI)  $\geq$  27  
45  
46 292 kg/m<sup>2</sup>, and a willingness to participate in the study. Participants are given detailed information  
47  
48 293 about the programme and provide informed consent. Exclusion criteria consist of factors that  
49  
50 294 would prevent successful participation in the programme, e.g., acute infections, addictions or  
51  
52 295 dementia, as well as insufficient knowledge of the German language. Participants are being  
53  
54 296 randomised (1:1) into an intervention group (IG) and control group (CG). Participants of the  
55  
56 297 IG are given a scale, a step counter, access to a tele-medical online portal, a data hub for  
57  
58 298 transmitting the measured values to the online portal, a glucose meter with test strips for the  
59  
60

1  
2  
3  
4 299 self-monitoring of blood glucose, and tele-medical telephone coaching from a personal health  
5  
6 300 coach in addition to routine care. The number and duration of interactions between the health  
7  
8 301 coach and the individuals in the IG are determined by the needs of the participants (on average  
9  
10 302 14 interactions over the course of the intervention with a duration of 10–30 minutes each). The  
11  
12 303 health coach encourages the participant, and they set goals together (i.e., behavioural changes  
13  
14 304 concerning physical activity and eating). For the IG, the measures of blood glucose are  
15  
16 305 recorded continuously, and pedometer data and weight (on a daily or weekly basis) are  
17  
18 306 automatically transmitted to the online portal by the devices. The data can be viewed by both  
19  
20 307 the participant and the coach. If a previously determined target value is exceeded or not  
21  
22 308 reached, an alert is triggered, and the coach may decide to intervene. In addition to the  
23  
24 309 monitoring function, the online portal provides information to support the change in lifestyle  
25  
26 310 and enable participants to manage their illness autonomously, for example, text-based  
27  
28 311 information on illness, nutrition, exercise, motivation, and health parameters. Furthermore,  
29  
30 312 functions are available for communication and information exchange between the actors who  
31  
32 313 are involved: participant and coach, as well as the attending general practitioner (GP) or  
33  
34 314 relatives with the participant's consent. Therefore, it is easy to exchange information and adapt  
35  
36 315 the therapy. The intervention will last 12 months. Participants of the CG are not accompanied  
37  
38 316 by a coach. Except for this, they receive the same components of the programme as the IG.  
39  
40 317 Participants register in the online portal and are asked for sociodemographic factors (sex, age,  
41  
42 318 employment status, education) and the duration of their diabetes. Afterwards, the intervention  
43  
44 319 begins. Participants are given devices and the IG is contacted by the personal health coach. In  
45  
46 320 the online portal, all participants answer questionnaires about their health-related quality of life  
47  
48 321 (Short-Form-Health Survey 12; SF-12), impairment due to depressive symptoms (German  
49  
50 322 version of the Centre for Epidemiological Studies-Depression Scale; CES-D Scale), eating  
51  
52 323 behaviour (German version of the Three-Factor Eating Questionnaire; FEV), and exercise  
53  
54 324 behaviour (Global Physical Activity Questionnaire, GPAQ)[49-52] at baseline, 3 months, 6

1  
2  
3 325 months, 9 months, 1 year (completion of the intervention), 15 months (follow-up phase), and  
4  
5  
6 326 18 months (follow-up phase) after baseline. If a questionnaire is not answered within two  
7  
8 327 weeks, participants are reminded by a telephone call from the online portal service staff. On a  
9  
10 328 quarterly basis, the participants' HbA<sub>1c</sub> level, BMI, fasting blood glucose, blood pressure,  
11  
12 329 triglycerides, HDL/LDL cholesterol, antihyperglycemic treatment, and blood pressure  
13  
14 330 medication are assessed by asking the attending GP. Body weight is recorded weekly, and  
15  
16 331 walked steps are recorded daily by the devices for both groups. For the IG, blood glucose is  
17  
18 332 monitored daily. The primary outcome is the HbA<sub>1c</sub> level. Secondary outcomes include  
19  
20 333 cardiovascular risk factors, health-related quality of life, and medication. The analysis of the  
21  
22 334 effectiveness and health economic evaluation of the TeLIPro trial will be the topic of a later  
23  
24 335 publication.

### 336 **Assessment of the DCE**

337 To address the DCE, respondents are provided with an extensive explanation of the meanings  
338 of all attributes and levels as well as information on how to deal with a choice set, accompanied  
339 by an example. Afterwards, respondents are told that they need to choose between two lifestyle  
340 programmes in the following choice sets. They are told that 13 choice sets are best suited for  
341 determining what type of lifestyle programme is preferred. Respondents are told to always  
342 choose their personally best-suited or least-rejected lifestyle programme and that there are no  
343 right or wrong answers. They are also reminded that they can always opt for a programme with  
344 all the features listed. Every choice task is accompanied by the invitation: 'Please select the  
345 coaching programme that suits you best'. Then both programmes (Programmes A and B) are  
346 presented (see Figure 1) followed by the question: 'Which programme do you prefer? (Please  
347 tick the appropriate box)'. Figure 1 presents an example of a choice task as included in the  
348 questionnaire. The DCE is measured before the start of the intervention and after 1 year when  
349 the intervention has been completed. Data collection for the DCE began in January 2019 and  
350 is anticipated to take place until December 2020.

1  
2  
3  
4 3515  
6 352 - *Please insert Figure 1 here* -7  
8 3539  
10 354 **Data analysis for the DCE**11  
12 355 To derive the preferences of people with T2DM regarding tele-medical lifestyle programmes13  
14 356 (i.e. relative preference weights for attributes and levels), the obtained baseline DCE data will15  
16 357 be analysed using a conditional logit model. Preference weights describe the relative strength17  
18 358 of each attribute and level in comparison with all other attributes and levels, respectively.19  
20 359 Furthermore, the preference weights will be expressed as time equivalents (willingness to21  
22 360 invest time) by calculating the trade-off or marginal rates of substitution between attributes and23  
24 361 the attribute that focuses on the time required by the programme. To investigate possible25  
26 362 preference heterogeneity, we will conduct a latent class analysis (LCA). The number of classes27  
28 363 is determined by the Bayesian information criterion as well as an examination of the29  
30 364 interpretation of the latent classes. The following covariates will be incorporated into the LCA:31  
32 365 sociodemographic factors (sex, age, employment status, and education), disease-related33  
34 366 characteristics (HbA<sub>1c</sub> level, duration of diabetes, BMI), exercise behaviour, depressive35  
36 367 symptoms, and health-related quality of life. Because the IG and CG are not expected to differ37  
38 368 at baseline due to randomisation, the analysis will be based on the full sample.39  
40 369 We will investigate the effect of latent classes of preferences at the beginning of the study on41  
42 370 programme success at the end of the study. This will be done by means of an LCA with a distal43  
44 371 outcome, where programme success is regressed on latent preference classes. This approach45  
46 372 will allow us to explore whether programme preferences differ with respect to distal outcomes47  
48 373 such as programme success. This type of analysis may lead to additional information about49  
50 374 heterogeneity in the (study) population.51  
52 375 To investigate changes due to participation, preference weights before and after participation53  
54 376 in the programme will be compared descriptively and analysed using time equivalents. The

1  
2  
3  
4 377 analysis will be outlined separately for the IG and the CG as their experiences during the  
5  
6 378 intervention phase will differ substantially.

7  
8 379

### 10 380 **Sample size calculation for the DCE**

11  
12 381 As no initial estimates about parameter values in the target population are available, we applied  
13  
14 382 a rule of thumb to determine the sample size instead of a parametric approach. According to  
15  
16 383 de Bekker-Grob et al. [53], one frequently used rule of thumb suggests  $N > 500c/(t * a)$ ,  
17  
18 384 where  $c$  is the largest number of levels among attributes,  $t$  is the number of choice tasks, and  
19  
20 385  $a$  is the number of alternatives per choice task. This was later refined by Orne [54] to  
21  
22 386  $N > 1000c/(t * a)$ , which resulted in a sample size of  $N = 167$  for our design. The  
23  
24 387 recruitment of 850 participants for the RCT will likely lead to a large enough sample that can  
25  
26 388 be stratified for the IG and CG.

27  
28  
29 389

### 30 390 **Patient and Public involvement**

31  
32 391 Patient involvement during the various stages of the development of the DCE (qualitative  
33  
34 392 interviews, pilot tests) ensured that the research question relied on the actual preferences of  
35  
36 393 people with T2DM participating in tele-medical lifestyle programmes.

37  
38  
39 394

### 40 395 **ETHICS AND DISSEMINATION**

41  
42 396 The DCE study has been approved by the ethics committee of the medical faculty of the  
43  
44 397 Heinrich Heine University committee of the Heinrich-Heine University Duesseldorf,  
45  
46 398 registration number 2018-242-ProspDEuA, registered on December 6th, 2018. The TeLIPro  
47  
48 399 trial is registered at the U. S. National Library of Medicine, registration number NCT03675919,  
49  
50 400 registered on September 15th, 2018. Patient consent to participate was obtained for the RCT  
51  
52 401 as well as for the DCE. Data analysis will be done according to the principles of good scientific  
53  
54 402 research on DCEs developed by the International Society for Pharmacoeconomics and



1  
2  
3  
4 403 Outcome Research (ISPOR). We aim to disseminate our results in peer-reviewed journals and  
5  
6 404 at national and international conferences to interested patient groups and the public.  
7  
8  
9  
10  
11  
12  
13  
14  
15  
16  
17  
18  
19  
20  
21  
22  
23  
24  
25  
26  
27  
28  
29  
30  
31  
32  
33  
34  
35  
36  
37  
38  
39  
40  
41  
42  
43  
44  
45  
46  
47  
48  
49  
50  
51  
52  
53  
54  
55  
56  
57  
58  
59  
60

For peer review only

## 405 **ACKNOWLEDGEMENTS**

406 We thank the team of the TeLIPro trial: the AOK Rhineland/Hamburg statutory health  
407 insurance (leader of the trial consortium), the German Institute for Telemedicine and Health  
408 Promotion GmbH (DITG), the Private Institute for Applied Care Research GmbH (inav), and  
409 the Association of Statutory Health Insurance Physicians of North Rhine-Westphalia  
410 (cooperation partner). We acknowledged the work of the DITG in programming and  
411 implementing the DCE at the online platform. We thank the diabetes care practice Kaltheuner,  
412 Schultens-Kaltheuner, Hannig, Marenbach, and their staff from Leverkusen, Germany, for  
413 their support. We also thank the volunteers from the self-help group at the German Diabetes  
414 Center in Duesseldorf, Germany, and the diabetes care practice in Leverkusen, Germany for  
415 participation in this study.

## 417 **AUTHOR STATEMENT**

418 MV and AI contributed to the initial grant application. All authors contributed to the design of  
419 the study and are involved in the implementation of the project. JS wrote the first draft of the  
420 protocol. JS, JD, SG, VG, MV, MR, and AI contributed to the drafting and editing of the  
421 protocol. All authors read and approved the final protocol.

## 423 **FUNDING**

424 This work was supported by the Innovation Fund coordinated by the Innovation Committee of  
425 the Federal Joint Committee (funding period 2018 - 2021) grant number 01NVF17033 under  
426 the consortium leadership of the AOK Rhineland/Hamburg.

## 428 **CONFLICTS OF INTEREST**

429 The authors declare that they have no competing interests.

1  
2  
3  
4 430

5  
6 431 **DATA STATEMENT**

7  
8  
9 432 After the data are collected and the results are published, the data will be made available upon  
10  
11 433 reasonable request.

12  
13  
14 434

15  
16 435 **SUPPLEMENTARY MATERIAL**

17  
18  
19 436 Results of the literature review to identify attributes used in DCEs to elicit preferences  
20  
21 437 regarding lifestyle changes, coaching, and devices.  
22  
23  
24  
25  
26  
27  
28  
29  
30  
31  
32  
33  
34  
35  
36  
37  
38  
39  
40  
41  
42  
43  
44  
45  
46  
47  
48  
49  
50  
51  
52  
53  
54  
55  
56  
57  
58  
59  
60

438 **REFERENCES**

- 439 1 Cho NH, Shaw JE, Karuranga S, et al. IDF Diabetes Atlas: Global estimates of diabetes  
440 prevalence for 2017 and projections for 2045. *Diabetes Res Clin Pract* 2018;138:271–81.  
441 doi:10.1016/j.diabres.2018.02.023
- 442 2 International Diabetes Federation. IDF Diabetes Atlas, 9th ed. Brussels: International  
443 Diabetes Federation, 2019.
- 444 3 Cradock KA, ÓLaighin G, Finucane FM, et al. Diet Behavior Change Techniques in Type  
445 2 Diabetes: A Systematic Review and Meta-analysis. *Diabetes Care* 2017;40:1800–10.  
446 doi:10.2337/dc17-0462
- 447 4 Greaves CJ, Sheppard KE, Abraham C, et al. Systematic review of reviews of intervention  
448 components associated with increased effectiveness in dietary and physical activity  
449 interventions. *BMC Public Health* 2011;11:119. doi:10.1186/1471-2458-11-119
- 450 5 Lim EL, Hollingsworth KG, Aribisala BS, et al. Reversal of type 2 diabetes: normalisation  
451 of beta cell function in association with decreased pancreas and liver triacylglycerol.  
452 *Diabetologia* 2011;54:2506–14. doi:10.1007/s00125-011-2204-7
- 453 6 Steven S, Taylor R. Restoring normoglycaemia by use of a very low calorie diet in long-  
454 and short-duration Type 2 diabetes. *Diabetic Med* 2015;32:1149–55.  
455 doi:10.1111/dme.12722
- 456 7 Umpierre D, Ribeiro PAB, Kramer CK, et al. Physical activity advice only or structured  
457 exercise training and association with HbA<sub>1c</sub> levels in type 2 diabetes: a systematic review  
458 and meta-analysis. *JAMA* 2011;305:1790–9. doi:10.1001/jama.2011.576
- 459 8 American Diabetes Association. 4. Lifestyle management: Standards of Medical Care in  
460 Diabetes—2018. *Diabetes Care* 2018;41(Suppl 1):P38–P50. doi:10.2337/dc18-S004
- 461 9 International Diabetes Federation. Clinical Guidelines Task Force. Global guideline for  
462 type 2 diabetes. Brussels: International Diabetes Federation, 2012.

- 1  
2  
3  
4 463 10 Paulweber B, Valensi P, Lindström J, et al. A European evidence-based guideline for the  
5  
6 464 prevention of type 2 diabetes. *Horm Metab Res* 2010;42(Suppl 1):P3. doi:10.1055/s-0029-  
7  
8 465 1240928  
9  
10  
11 466 11 Bollyky JB, Bravata D, Yang J, et al. Remote Lifestyle Coaching Plus a Connected  
12  
13 467 Glucose Meter with Certified Diabetes Educator Support Improves Glucose and Weight  
14  
15 468 Loss for People with Type 2 Diabetes. *J Diabetes Res* 2018;3961730.  
16  
17 469 doi:10.1155/2018/3961730  
18  
19  
20 470 12 Kempf K, Altpeter B, Berger J, et al. Efficacy of the Tele-medical Lifestyle intervention  
21  
22 471 Program TeLIPro in Advanced Stages of Type 2 Diabetes: A Randomized Controlled  
23  
24 472 Trial. *Diabetes Care* 2017;40:863–71. doi:10.2337/dc17-0303  
25  
26  
27 473 13 Kumar S, Moseson H, Uppal J, et al. A Diabetes Mobile App With In-App Coaching From  
28  
29 474 a Certified Diabetes Educator Reduces A1C for Individuals With Type 2 Diabetes.  
30  
31 475 *Diabetes Educ* 2018;44:226–36. doi:10.1177/0145721718765650  
32  
33  
34 476 14 Wayne N, Perez DF, Kaplan DM, et al. Health Coaching Reduces HbA<sub>1c</sub> in Type 2  
35  
36 477 Diabetic Patients From a Lower-Socioeconomic Status Community: A Randomized  
37  
38 478 Controlled Trial. *J Med Internet Res* 2015;17:e224. doi:10.2196/jmir.4871  
39  
40  
41 479 15 Cahn A, Akirov A, Raz I. Digital health technology and diabetes management. *J Diabetes*  
42  
43 480 2018;10:10–7. doi:10.1111/1753-0407.12606  
44  
45  
46 481 16 Hood M, Wilson R, Corsica J, et al. What do we know about mobile applications for  
47  
48 482 diabetes self-management? A review of reviews. *J Behav Med* 2016;39:981–94.  
49  
50 483 doi:10.1007/s10865-016-9765-3  
51  
52  
53 484 17 Hunt CW. Technology and diabetes self-management: An integrative review. *World J*  
54  
55 485 *Diabetes* 2015;6:225–33. doi:10.4239/wjd.v6.i2.225  
56  
57  
58 486 18 Scholl I, Zill JM, Härter M, et al. An integrative model of patient-centeredness - a  
59  
60 487 systematic review and concept analysis. *PLoS ONE* 2014;9:e107828.  
488 488 doi:10.1371/journal.pone.0107828

- 1  
2  
3  
4 489 19 Lancsar E, Louviere J. Conducting Discrete Choice Experiments to Inform Healthcare  
5  
6 490 Decision Making. *Pharmacoeconomics* 2008;26:661–77. doi:10.2165/00019053-  
7  
8 491 200826080-00004
- 9  
10 492 20 Mühlbacher A, Johnson R. Choice experiments to quantify preferences for health and  
11  
12 493 healthcare: state of the practice. *Appl Health Econ Health Policy* 2016;14:253-66.  
13  
14 494 doi:10.1007/s40258-016-0232-7
- 15  
16  
17 495 21 Craig BM, Lancsar E, Mühlbacher AC, et al. Health Preference Research: An Overview.  
18  
19 496 *Patient*, 2017;10:507–10. doi:10.1007/s40271-017-0253-9
- 20  
21  
22 497 22 Flood EM, Bell KF, de La Cruz MC, et al. Patient preferences for diabetes treatment  
23  
24 498 attributes and drug classes. *Curr Med Res Opin* 2017;33:261–8.  
25  
26 499 doi:10.1080/03007995.2016.1253553
- 27  
28  
29 500 23 Janssen EM, Longo DR, Bardsley JK, et al. Education and patient preferences for treating  
30  
31 501 type 2 diabetes: a stratified discrete-choice experiment. *Patient Prefer Adherence*  
32  
33 502 2017;11:1729–36. doi:10.2147/PPA.S139471
- 34  
35  
36 503 24 Jendle J, Torffvit O, Ridderstråle M, et al. Willingness to pay for health improvements  
37  
38 504 associated with anti-diabetes treatments for people with type 2 diabetes. *Curr Med Res*  
39  
40 505 *Opin* 2010;26:917–23. doi:10.1185/03007991003657867
- 41  
42  
43 506 25 Joy SM, Little E, Maruthur NM, et al. Patient preferences for the treatment of type 2  
44  
45 507 diabetes: a scoping review. *Pharmacoeconomics* 2013;31:877–92. doi:10.1007/s40273-  
46  
47 508 013-0089-7
- 48  
49  
50 509 26 Mühlbacher A, Bethge S. What matters in type 2 diabetes mellitus oral treatment? A  
51  
52 510 discrete choice experiment to evaluate patient preferences. *Eur J Health Econ*  
53  
54 511 2016;17:1125–40. doi:10.1007/s10198-015-0750-5
- 55  
56  
57 512 27 Salampessy BH, Veldwijk J, Jantine Schuit A, et al. The Predictive Value of Discrete  
58  
59 513 Choice Experiments in Public Health: An Exploratory Application. *Patient* 2015;8:521–  
60  
514 9. doi:10.1007/s40271-015-0115-2

- 1  
2  
3  
4 515 28 Veldwijk J, Lambooi MS, van Gils PF, et al. Type 2 diabetes patients' preferences and  
5  
6 516 willingness to pay for lifestyle programs: a discrete choice experiment. *BMC Public*  
7  
8 517 *Health* 2013;13:1099. doi:10.1186/1471-2458-13-1099  
9  
10 518 29 Wanders JOP, Veldwijk J, de Wit GA, et al. The effect of out-of-pocket costs and financial  
11  
12 519 rewards in a discrete choice experiment: an application to lifestyle programs. *BMC Public*  
13  
14 520 *Health* 2014;14:870. doi:10.1186/1471-2458-14-870  
15  
16  
17 521 30 Swift JK, Callahan JL. The impact of client treatment preferences on outcome: a meta-  
18  
19 522 analysis. *J Clin Psychol* 2009;65:368–81. doi:10.1002/jclp.20553  
20  
21  
22 523 31 Uebelacker LA, Weinstock LM, Battle CL, et al. Treatment credibility, expectancy, and  
23  
24 524 preference: Prediction of treatment engagement and outcome in a randomized clinical trial  
25  
26 525 of hatha yoga vs. health education as adjunct treatments for depression. *J Affect Disord*  
27  
28 526 2017;238:111–7. doi:10.1016/j.jad.2018.05.009  
29  
30  
31 527 32 Delevry D, Le Q. Effect of Treatment Preference in Randomized Controlled Trials:  
32  
33 528 Systematic Review of the Literature and Meta-Analysis. *Patient* 2019;12:1–17.  
34  
35 529 doi:10.1007/s40271-019-00379-6  
36  
37  
38 530 33 Kwan M, Dimidjian S, Rizvi SL. Treatment preference, engagement, and clinical  
39  
40 531 improvement in pharmacotherapy versus psychotherapy for depression. *Behav Res Ther*  
41  
42 532 2010;48:799–804. doi:10.1016/j.brat.2010.04.003  
43  
44  
45 533 34 Le, QA, Doctor JN, Zoellner LA, et al. Effects of treatment, choice, and preference on  
46  
47 534 health-related quality-of-life outcomes in patients with posttraumatic stress disorder  
48  
49 535 (PTSD). *Qual Life Res* 2018;27:1555–62. doi:10.1007/s11136-018-1833-4  
50  
51  
52 536 35 Rigby D, Burton M, Pluske J. Preference stability and choice consistency in discrete choice  
53  
54 537 experiments. *Environ Resour Econ* 2016;65:441–61. doi:10.1007/s10640-015-9913-1  
55  
56  
57 538 36 Price J, Dupont D, Adamowicz W. As time goes by: Examination of temporal stability  
58  
59 539 across stated preference question formats. *Environ Resour Econ* 2017;68:643–62.  
60  
540 doi:10.1007/s10640-016-0039-x

- 1  
2  
3  
4 541 37 San Miguel F, Ryan M, Scott A. Are preferences stable? The case of health care. *J Econ*  
5  
6 542 *Behav Organ* 2002;48:1–14. doi:10.1016/S0167-2681(01)00220-7  
7
- 8 543 38 Benning TM, Dellaert BG, Severens JL, et al. The effect of presenting information about  
9  
10 544 invasive follow-up testing on individuals' noninvasive colorectal cancer screening  
11  
12 545 participation decision: results from a discrete choice experiment. *Value Health*  
13  
14 546 2014;17:578–87. doi:10.1016/j.jval.2014.04.007  
15
- 16  
17 547 39 TeLIPro – Aktiv mit Diabetes. 2019. Retrieved from <https://www.telipro-aok.de/> accessed  
18  
19 548 December 2019.  
20
- 21  
22 549 40 Jan S, Usherwood T, Brien JA, et al. What determines adherence to treatment in  
23  
24 550 cardiovascular disease prevention? Protocol for a mixed methods preference study. *BMJ*  
25  
26 551 *Open* 2011;1:e000372. doi:10.1136/bmjopen-2011-000372  
27
- 28  
29 552 41 Walker RC, Morton RL, Tong A, et al. Patient and caregiver preferences for home dialysis  
30  
31 553 —the home first study: a protocol for qualitative interviews and discrete choice  
32  
33 554 experiments. *BMJ Open* 2015;5:e007405. doi:10.1136/bmjopen-2014-007405  
34
- 35  
36 555 42 Spinks J, Chaboyer W, Bucknall T, et al. Patient and nurse preferences for nurse  
37  
38 556 handover—using preferences to inform policy: a discrete choice experiment protocol. *BMJ*  
39  
40 557 *Open* 2015;5:e008941. doi:10.1136/bmjopen-2015-008941  
41
- 42  
43 558 43 Wong SF, Norman R, Dunning TL, et al. A protocol for a discrete choice experiment:  
44  
45 559 understanding preferences of patients with cancer towards their cancer care across  
46  
47 560 metropolitan and rural regions in Australia. *BMJ Open* 2014;4:e006661.  
48  
49 561 doi:10.1136/bmjopen-2014-006661  
50
- 51  
52 562 44 Quaife M, Eakle R, Cabrera M, et al. Preferences for ARV-based HIV prevention methods  
53  
54 563 among men and women, adolescent girls and female sex workers in Gauteng Province,  
55  
56 564 South Africa: a protocol for a discrete choice experiment. *BMJ Open* 2016;6:e010682.  
57  
58 565 doi:10.1136/bmjopen-2015-010682  
59  
60



- 1  
2  
3  
4 566 45 Janssen EM, Segal JB, Bridges JFP. A Framework for Instrument Development of a  
5  
6 567 Choice Experiment: An Application to Type 2 Diabetes. *Patient* 2016;9:465–79.  
7  
8 568 doi:10.1007/s40271-016-0170-3  
9  
10 569 46 Janssen EM, Bridges JFP. Art and Science of Instrument Development for Stated-  
11  
12 570 Preference Methods. *Patient* 2017;10:377–9. doi:10.1007/s40271-017-0261-9  
13  
14  
15 571 47 Janssen EM, Hauber AB, Bridges JFP. Conducting a Discrete-Choice Experiment Study  
16  
17 572 Following Recommendations for Good Research Practices: An Application for Eliciting  
18  
19 573 Patient Preferences for Diabetes Treatments. *Value Health* 2018;21:59–68.  
20  
21 574 doi:10.1016/j.jval.2017.07.001  
22  
23  
24 575 48 Kuhfeld, Warren F. Marketing research methods in SAS: experimental design, choice,  
25  
26 576 conjoint, and graphical techniques. SAS Document TS-694.[http://support.sas.com/techsup/tech\\_note/ts694.pdf](http://support.sas.com/techsup/tech_note/ts694.pdf). Accessed on March 2, 2007.  
27  
28 577  
29  
30 578 49 Gandek B, Ware JE, Aaronson NK, et al. Cross-validation of item selection and scoring  
31  
32 579 former reference 39 for the SF-12 Health Survey in nine countries: results from the IQOLA  
33  
34 580 Project. International Quality of Life Assessment. *J Clin Epidemiol* 1998;51:1171–8.  
35  
36 581 doi:10.1016/S0895-4356(98)00109-7  
37  
38  
39 582 50 Hautzinger M, Bailer M. Allgemeine Depressionsskala (ADS), Weinheim, Germany:  
40  
41 583 Beltz, 1993.  
42  
43  
44 584 51 Stunkard AJ, Messick S. The Three-Factor Eating Questionnaire to measure dietary  
45  
46 585 restraint, disinhibition and hunger. *J Psychosom Res* 1985;29:71–83. doi:10.1016/0022-  
47  
48 586 3999(85)90010-8  
49  
50  
51 587 52 Armstrong T, Bull F. Development of the World Health Organization Global Physical  
52  
53 588 Activity Questionnaire (GPAQ) *J Public Health* 2006;14:66. doi:10.1007/s10389-006-  
54  
55 589 0024-x  
56  
57  
58  
59  
60

1  
2  
3  
4 590 53 de Bekker-Grob EW, Donkers B, Jonker MF, et al. Sample size requirements for discrete-  
5  
6 591 choice experiments in healthcare: a practical guide. *Patient* 2015;8:373–84.  
7  
8 592 doi:10.1007/s40271-015-0118-z  
9

10 593 54 Orme, B. Getting started with conjoint analysis: strategies for product design and pricing  
11  
12 research second edition. *Madison: Research Publishers LLC*; 2010;64.  
13  
14

15 595

16  
17 596 **Caption of Figures**

18  
19 597 **Figure 1:** Example of a choice task used in the discrete choice experiment.  
20  
21  
22  
23  
24  
25  
26  
27  
28  
29  
30  
31  
32  
33  
34  
35  
36  
37  
38  
39  
40  
41  
42  
43  
44  
45  
46  
47  
48  
49  
50  
51  
52  
53  
54  
55  
56  
57  
58  
59  
60

1  
2  
3  
4  
5  
6  
7  
8  
9  
10  
11  
12  
13  
14  
15  
16  
17  
18  
19  
20  
21  
22  
23  
24  
25  
26  
27  
28  
29  
30  
31  
32  
33  
34  
35  
36  
37  
38  
39  
40  
41  
42  
43  
44  
45  
46  
47  
48  
49  
50  
51  
52  
53  
54  
55  
56  
57  
58  
59  
60

## First Choice

Please select the coaching programme that suits you best.

|                                                                             | Programme A                                       | Programme B                                   |
|-----------------------------------------------------------------------------|---------------------------------------------------|-----------------------------------------------|
| <b>The functions and handling of the online portal</b>                      | <b>Extensive and complex</b>                      | <b>Less extensive and simple</b>              |
| <b>Communication between coach and doctors</b>                              | My coach and my doctors <b>do not</b> communicate | My coach and my doctors <b>do</b> communicate |
| <b>Responsibility for getting acquainted with a healthier lifestyle</b>     | I receive information from my <b>doctor</b>       | I receive information from my <b>coach</b>    |
| <b>Group activities</b>                                                     | No group activities                               | Group activities                              |
| <b>Responsibility for the goals of the exercise and menu schedule</b>       | <b>My coach sets my goals</b>                     | <b>I set my goals independently</b>           |
| <b>Total time required</b>                                                  | <b>10</b> hours per week                          | <b>8</b> hours per week                       |
| <b>Which programme do you prefer?<br/>(Please tick the appropriate box)</b> | <input type="checkbox"/>                          | <input type="checkbox"/>                      |

## Supplementary File

Results of the literature review to identify attributes used in DCEs to elicit preferences regarding lifestyle changes, coaching, and devices.

| DCE Topic | Attribute                      | Levels                                                                                                                                                                                                                                                                                                                    | Reference                                         |
|-----------|--------------------------------|---------------------------------------------------------------------------------------------------------------------------------------------------------------------------------------------------------------------------------------------------------------------------------------------------------------------------|---------------------------------------------------|
| Devices   | Comfort of wearing             | <ul style="list-style-type: none"> <li>- Warm and squeezing</li> <li>- Breathing and not squeezing</li> <li>- Comfortable</li> <li>- Uncomfortable</li> </ul>                                                                                                                                                             | Bouman et al.,2016 [1]<br>Bunge et al., 2010 [2]  |
| Devices   | Appearance                     | <ul style="list-style-type: none"> <li>- Thick material and skin colored</li> <li>- Thin material and color of choice</li> <li>- Visible</li> <li>- Not visible</li> </ul>                                                                                                                                                | Bouman et al.,2016 [1]<br>Bunge et al., 2010 [2]  |
| Devices   | Help Needed                    | <ul style="list-style-type: none"> <li>- Help needed</li> <li>- Independently</li> <li>- No help needed while emptying your bowels</li> <li>- You need less help than you did previously</li> <li>- You need as much help as you did previously</li> <li>- You need more help than you did previously</li> </ul>          | Bouman et al.,2016 [1]<br>Nafees et al.,2016 [3]  |
| Devices   | Duration of therapy            | <ul style="list-style-type: none"> <li>- 6 months</li> <li>- 15 months</li> <li>- 24 months</li> </ul>                                                                                                                                                                                                                    | Bouman et al.,2016 [1]                            |
| Devices   | Device Hygiene                 | <ul style="list-style-type: none"> <li>- Hand washed, dries slowly</li> <li>- Machine washed, dries quickly</li> <li>- Mouthpiece can be washed, but not replaced</li> <li>- Mouthpiece can be replaced, but not washed</li> <li>- Mouthpiece can be cleaned with a dry cloth, but not washed or replaced</li> </ul>      | Bouman et al.,2016 [1]<br>Hawken et al.,2017 [4]  |
| Devices   | Easy to Use                    | <ul style="list-style-type: none"> <li>- 1 step</li> <li>- 2 to 3 steps</li> <li>- More than 4 steps</li> <li>- You will use an automatic pump (process requiring ~15 steps)</li> <li>- You will use a manual pump (process requiring ~30 steps)</li> </ul>                                                               | Hawken et al.,2017 [4]<br>Nafees et al.,2016 [3]  |
| Devices   | Flexibility of device handling | <ul style="list-style-type: none"> <li>- Inhaler can be held in any position throughout inhalation process</li> <li>- Inhaler must be held in certain position throughout inhalation process</li> </ul>                                                                                                                   | Hawken et al.,2017 [4]                            |
| Devices   | Time to use per treatment      | <ul style="list-style-type: none"> <li>- 5 minutes</li> <li>- 10 minutes</li> <li>- 15 minutes</li> <li>- 25 minutes</li> <li>- 30 minutes</li> <li>- You will spend up to 30 minutes</li> <li>- You will spend up to 1 hour</li> <li>- You will spend up to 1.5 hours</li> <li>- You will spend up to 2 hours</li> </ul> | Mohamed et al.,2015 [5]<br>Nafees et al.,2016 [3] |

| DCE Topic             | Attribute                                                             | Levels                                                                                                                                                                                                                                                                                                                                                                                                                                                                                                                                       | Reference                                                                                               |
|-----------------------|-----------------------------------------------------------------------|----------------------------------------------------------------------------------------------------------------------------------------------------------------------------------------------------------------------------------------------------------------------------------------------------------------------------------------------------------------------------------------------------------------------------------------------------------------------------------------------------------------------------------------------|---------------------------------------------------------------------------------------------------------|
| Devices<br>(Coaching) | Frequency of use                                                      | <ul style="list-style-type: none"> <li>- None</li> <li>- 2 pills 3 times a day (6 pills per day)</li> <li>- 3 pills 4 times a day (12 pills per day)</li> <li>- 2 times per day</li> <li>- 3 times per day</li> <li>- Once every two days on average</li> <li>- Once every day on average</li> <li>- Twice a day on average</li> <li>- Three times a day on average</li> <li>- Once per day</li> <li>- Once per week</li> <li>- Once per month</li> <li>- Once per 3 months</li> <li>- Once per 6 months</li> <li>- Once per year</li> </ul> | Marshall et al.,2017 [6]<br>Mohamed et al.,2015 [5]<br>Nafees et al.,2016 [3]<br>Quaife et al.,2016 [7] |
| Coaching              | Training of the IP<br>(information provider)                          | <ul style="list-style-type: none"> <li>- Counselor with specialized training in use of medications during pregnancy only</li> <li>- Family doctor with general health training</li> </ul>                                                                                                                                                                                                                                                                                                                                                    | Hancock-Howard et al.,2012 [8]                                                                          |
| Coaching              | Method of counseling<br>and waiting time                              | <ul style="list-style-type: none"> <li>- Make an appointment and meet with the IP in person in 3 days</li> <li>- Call a telephone service and receive the information within 30-minutes</li> </ul>                                                                                                                                                                                                                                                                                                                                           | Hancock-Howard et al.,2012 [8]                                                                          |
| Coaching              | Knowing the IP                                                        | <ul style="list-style-type: none"> <li>- You have met the IP before and they know your medical history</li> <li>- You have never met the IP</li> </ul>                                                                                                                                                                                                                                                                                                                                                                                       | Hancock-Howard et al.,2012 [8]                                                                          |
| Coaching              | Confidence in the<br>skills of the IP                                 | <ul style="list-style-type: none"> <li>- You have confidence in the skills of the IP</li> <li>- You know nothing about the skills of the IP</li> </ul>                                                                                                                                                                                                                                                                                                                                                                                       | Hancock-Howard et al.,2012 [8]                                                                          |
| Coaching              | Helpfulness of<br>information                                         | <ul style="list-style-type: none"> <li>- Enough information has been provided that you believe your question has been answered to your satisfaction</li> <li>- Some information has been provided to you, but your question has not been completely answered to your satisfaction</li> </ul>                                                                                                                                                                                                                                                 | Hancock-Howard et al.,2012 [8]                                                                          |
| Coaching              | Time away from<br>home/office/usual<br>activities<br>including travel | <ul style="list-style-type: none"> <li>- More than four hours</li> <li>- 3–4 h</li> <li>- 1–2 h</li> </ul>                                                                                                                                                                                                                                                                                                                                                                                                                                   | Spinks et al.,2016 [9]                                                                                  |
| Coaching              | Wait time to get result                                               | <ul style="list-style-type: none"> <li>- Up to three days</li> <li>- Up to one day</li> <li>- Less than four hours</li> </ul>                                                                                                                                                                                                                                                                                                                                                                                                                | Spinks et al.,2016 [9]                                                                                  |
| Coaching              | Who reviews the result                                                | <ul style="list-style-type: none"> <li>- GP</li> <li>- Telederm dermatologist</li> </ul>                                                                                                                                                                                                                                                                                                                                                                                                                                                     | Spinks et al.,2016 [9]                                                                                  |
| Coaching<br>Diabetes  | Feedback on physical<br>activity performance                          | <ul style="list-style-type: none"> <li>- Patient receives feedback on his or her individual performance</li> <li>- Patient's performance is compared with that of other patients</li> </ul>                                                                                                                                                                                                                                                                                                                                                  | Ramirez et al.,2016 [10]                                                                                |
| Coaching<br>Diabetes  | Physical activity<br>behavior-change<br>education                     | <ul style="list-style-type: none"> <li>- Patient's doctor recommends the educational content</li> <li>- Patient specifies the type of educational content he or she wants to receive</li> </ul>                                                                                                                                                                                                                                                                                                                                              | Ramirez et al.,2016 [10]                                                                                |
| Coaching<br>Diabetes  | Frequency of messaging                                                | <ul style="list-style-type: none"> <li>- Patient's doctor recommends how often patient should receive messages</li> <li>- Patient specifies how often he or she wants to receive messages</li> </ul>                                                                                                                                                                                                                                                                                                                                         | Ramirez et al.,2016 [10]                                                                                |

| DCE Topic          | Attribute                  | Levels                                                                                                                                                                                                                                                                                                                                                                                                                                                                                                                                                                                                                                                                                                                                                                                                                                                                                                                                                                                                                                                                                                                                                                     | Reference                                                                                                                    |
|--------------------|----------------------------|----------------------------------------------------------------------------------------------------------------------------------------------------------------------------------------------------------------------------------------------------------------------------------------------------------------------------------------------------------------------------------------------------------------------------------------------------------------------------------------------------------------------------------------------------------------------------------------------------------------------------------------------------------------------------------------------------------------------------------------------------------------------------------------------------------------------------------------------------------------------------------------------------------------------------------------------------------------------------------------------------------------------------------------------------------------------------------------------------------------------------------------------------------------------------|------------------------------------------------------------------------------------------------------------------------------|
| Lifestyle Diabetes | Menu schedule              | <ul style="list-style-type: none"> <li>- <i>Flexible</i> you set your own goals and develop your own menu schedule to reach these goals without the assistance of a lifestyle coach</li> <li>- <i>General</i> your lifestyle coach informs you about health and unhealthy foods, using food information and examples of recipes</li> <li>- <i>Elaborate</i> your lifestyle coach develops a menu schedule that meets your needs and wishes</li> <li>- Flexible: primarily based on the participants' own initiatives and ideas</li> <li>- General: includes general information on a healthy diet and provides example recipes</li> <li>- Elaborate: a patient tailored schedule that is completely prepared by the lifestyle coach</li> <li>- Flexible (you composed this schedule)</li> <li>- General (with information about diet and examples of recipes)</li> <li>- Elaborate (this schedule is composed for you and tailored to your needs)</li> </ul>                                                                                                                                                                                                               | <p>Salampeyy et al.,2015 [11]<br/> Veldwijk et al.,2013 [12]<br/> Wanders et al.,2014 [13]</p>                               |
| Lifestyle Diabetes | Physical activity schedule | <ul style="list-style-type: none"> <li>- Patient's doctor recommends physical activity goals</li> <li>- Patient selects his or her own personalized physical activity goals</li> <li>- <i>Flexible</i> you set your own goals and develop your own activity schedule to reach these goals without the assistance of a lifestyle coach</li> <li>- <i>General</i> your lifestyle coach informs you about what physical activities would be good for you, using information about physical activity and examples of exercises</li> <li>- <i>Elaborate</i> your lifestyle coach develops a physical activity schedule that meets your needs and wishes</li> <li>- Flexible: primarily based on the participants' own initiatives and ideas</li> <li>- General: includes general information on PA, and provides example exercises</li> <li>- Elaborate: a patient tailored schedule that is completely prepared by the lifestyle coach</li> <li>- Flexible (you composed this schedule)</li> <li>- General (with information about physical activity and examples of exercises)</li> <li>- Elaborate (this schedule is composed for you and tailored to your needs)</li> </ul> | <p>Ramirez et al.,2016 [10]<br/> Salampeyy et al.,2015 [11]<br/> Veldwijk et al.,2013 [12]<br/> Wanders et al.,2014 [13]</p> |

| DCE Topic                   | Attribute                               | Levels                                                                                                                                                                                                                                                                                                                                                                                                                                                                                                                                                                                                                                                                                                                                   | Reference                                                                                                        |
|-----------------------------|-----------------------------------------|------------------------------------------------------------------------------------------------------------------------------------------------------------------------------------------------------------------------------------------------------------------------------------------------------------------------------------------------------------------------------------------------------------------------------------------------------------------------------------------------------------------------------------------------------------------------------------------------------------------------------------------------------------------------------------------------------------------------------------------|------------------------------------------------------------------------------------------------------------------|
| Coaching Lifestyle Diabetes | Consultation Structure / Social support | <ul style="list-style-type: none"> <li>- Family members learn how to offer support</li> <li>- Patient meets other patients so they can support one another</li> <li>- <i>Individual</i> the consultations of the lifestyle program are individually</li> <li>- <i>Consultation 5</i> the consultations of the lifestyle program are in groups of 5 <i>other patients</i></li> <li>- <i>Consultation 10</i> the consultations of the lifestyle program are in groups of 10 <i>other patients</i></li> <li>- Individually</li> <li>- Groups with 5 other T2DM patients</li> <li>- Groups with 10 other T2DM patients</li> <li>- individual</li> <li>- in a group with 5 other people</li> <li>- in a group with 10 other people</li> </ul> | Ramirez et al.,2016 [10]<br>Salampessy et al.,2015 [11]<br>Veldwijk et al.,2013 [12]<br>Wanders et al.,2014 [13] |
| Lifestyle Diabetes          | Time spent on the program               | <ul style="list-style-type: none"> <li>- 2.5 hours per week</li> <li>- 4 hours per week</li> </ul>                                                                                                                                                                                                                                                                                                                                                                                                                                                                                                                                                                                                                                       | Van Gils et al.,2011 [14]                                                                                        |
| Lifestyle Diabetes          | Arrangement physical activity lessons   | <ul style="list-style-type: none"> <li>- Individually with men and women</li> <li>- With people of the same gender</li> </ul>                                                                                                                                                                                                                                                                                                                                                                                                                                                                                                                                                                                                            | Van Gils et al.,2011 [14]                                                                                        |
| Lifestyle Diabetes          | Group activity                          | <ul style="list-style-type: none"> <li>- Only with people without diabetes</li> <li>- Only with other diabetes patients</li> </ul>                                                                                                                                                                                                                                                                                                                                                                                                                                                                                                                                                                                                       | Van Gils et al.,2011 [14]                                                                                        |
| Lifestyle Diabetes          | Sports activity                         | <ul style="list-style-type: none"> <li>- Walking/cycling</li> <li>- Fitness (treadmill, rowing machine, bicycle)</li> </ul>                                                                                                                                                                                                                                                                                                                                                                                                                                                                                                                                                                                                              | Van Gils et al.,2011 [14]                                                                                        |
| Lifestyle Diabetes          | Counseling                              | <ul style="list-style-type: none"> <li>- None</li> <li>- Physical therapist/sports teacher</li> </ul>                                                                                                                                                                                                                                                                                                                                                                                                                                                                                                                                                                                                                                    | Van Gils et al.,2011 [14]                                                                                        |

### References of supplementary material

- [1] Bouman AC, Cate-Hoek AJ ten, Dirksen CD, et al. Eliciting patients' preferences for elastic compression stocking therapy after deep vein thrombosis: potential for improving compliance. *J Thromb Haemost* 2016;14:510–7. doi:10.1111/jth.13228
- [2] Bunge EM, Bekker-Grob EW de, van Biezen FC, et al. Patients' preferences for scoliosis brace treatment: a discrete choice experiment. *Spine* 2010;35:57–63. doi:10.1097/BRS.0b013e3181bdeaa6
- [3] Nafees B, Lloyd AJ, Ballinger RS, et al. Managing neurogenic bowel dysfunction: what do patients prefer? A discrete choice experiment of patient preferences for transanal irrigation and standard bowel management. *Patient Prefer Adherence* 2016;10:195–204. doi:10.2147/PPA.S96082
- [4] Hawken N, Torvinen S, Neine M-E, et al. Patient preferences for dry powder inhaler attributes in asthma and chronic obstructive pulmonary disease in France: a discrete choice experiment. *BMC Pulm Med* 2017;17:99. doi:10.1186/s12890-017-0439-x

- 1  
2  
3  
4 [5] Mohamed AF, Johnson FR, Balp M-M, et al. Preferences and Stated Adherence for  
5 Antibiotic Treatment of Cystic Fibrosis Pseudomonas Infections. *Patient* 2016;9:59–  
6 67. doi:10.1007/s40271-015-0124-1  
7  
8  
9 [6] Marshall T, Pugh A, Fairchild A, et al. Patient Preferences for Device-Aided  
10 Treatments Indicated for Advanced Parkinson Disease. *Value Health* 2017;20:1383–  
11 93. doi:10.1016/j.jval.2017.06.001  
12  
13  
14 [7] Quaife M, Eakle R, Cabrera M, et al. Preferences for ARV-based HIV prevention  
15 methods among men and women, adolescent girls and female sex workers in Gauteng  
16 Province, South Africa: a protocol for a discrete choice experiment. *BMJ Open*  
17 2016;6:e010682. doi:10.1136/bmjopen-2015-010682  
18  
19 [8] Hancock-Howard RL, Ungar WJ, Marshall D, et al. Public preferences for counseling  
20 regarding antidepressant use during pregnancy: a discrete choice experiment. *Birth*  
21 *Defects Res Part A Clin Mol Teratol* 2012;94:532–9. doi:10.1002/bdra.23042  
22  
23 [9] Spinks J, Janda M, Soyer HP, et al. Consumer preferences for teledermoscopy  
24 screening to detect melanoma early. *J Telemed Telecare* 2016;22:39–46.  
25 doi:10.1177/1357633X15586701  
26  
27 [10] Ramirez M, Wu S, Beale E. Designing a Text Messaging Intervention to Improve  
28 Physical Activity Behavior Among Low-Income Latino Patients With Diabetes: A  
29 Discrete-Choice Experiment, Los Angeles, 2014-2015. *Prev Chronic Dis*  
30 2016;13:E171. doi:10.5888/pcd13.160035  
31  
32 [11] Salampessy BH, Veldwijk J, Jantine Schuit A, et al. The Predictive Value of Discrete  
33 Choice Experiments in Public Health: An Exploratory Application. *Patient*  
34 2015;8:521–9. doi:10.1007/s40271-015-0115-2  
35  
36 [12] Veldwijk J, Lambooj MS, van Gils PF, et al. Type 2 diabetes patients' preferences  
37 and willingness to pay for lifestyle programs: a discrete choice experiment. *BMC*  
38 *Public Health* 2013;13:1099. doi:10.1186/1471-2458-13-1099  
39  
40 [13] Wanders JOP, Veldwijk J, Wit GA de, et al. The effect of out-of-pocket costs and  
41 financial rewards in a discrete choice experiment: an application to lifestyle programs.  
42 *BMC Public Health* 2014;14:870. doi:10.1186/1471-2458-14-870  
43  
44 [14] van Gils PF, Lambooj MS, Flanderijn MH, et al. Willingness to participate in a  
45 lifestyle intervention program of patients with type 2 diabetes mellitus: a conjoint  
46 analysis. *Patient Prefer Adherence* 2011;5:537–46. doi:10.2147/PPA.S16854  
47  
48  
49  
50  
51  
52  
53  
54  
55  
56  
57  
58  
59  
60
