# Supplementary material for: Preferences of people with type 2 diabetes for telemedical lifestyle programmes in Germany: protocol of a discrete choice experiment
Source: PubMed Central journal article supplement — BMJ Open. 2020 Sep 9;10(9):e036995. doi: 10.1136/bmjopen-2020-036995 (PMC7482475; doi:10.1136/bmjopen-2020-036995), 2020-09-09
Supplement: bmjopen-2020-036995supp001.pdf [file bmjopen-2020-036995supp001.pdf]

## Supplementary File

Results of the literature review to identify attributes used in DCEs to elicit preferences regarding lifestyle changes, coaching, and devices.

| DCE Topic | Attribute                      | Levels                                                                                                                                                                                                                                                                                                                    | Reference                                         |
|-----------|--------------------------------|---------------------------------------------------------------------------------------------------------------------------------------------------------------------------------------------------------------------------------------------------------------------------------------------------------------------------|---------------------------------------------------|
| Devices   | Comfort of wearing             | <ul style="list-style-type: none"> <li>- Warm and squeezing</li> <li>- Breathing and not squeezing</li> <li>- Comfortable</li> <li>- Uncomfortable</li> </ul>                                                                                                                                                             | Bouman et al.,2016 [1]<br>Bunge et al., 2010 [2]  |
| Devices   | Appearance                     | <ul style="list-style-type: none"> <li>- Thick material and skin colored</li> <li>- Thin material and color of choice</li> <li>- Visible</li> <li>- Not visible</li> </ul>                                                                                                                                                | Bouman et al.,2016 [1]<br>Bunge et al., 2010 [2]  |
| Devices   | Help Needed                    | <ul style="list-style-type: none"> <li>- Help needed</li> <li>- Independently</li> <li>- No help needed while emptying your bowels</li> <li>- You need less help than you did previously</li> <li>- You need as much help as you did previously</li> <li>- You need more help than you did previously</li> </ul>          | Bouman et al.,2016 [1]<br>Nafees et al.,2016 [3]  |
| Devices   | Duration of therapy            | <ul style="list-style-type: none"> <li>- 6 months</li> <li>- 15 months</li> <li>- 24 months</li> </ul>                                                                                                                                                                                                                    | Bouman et al.,2016 [1]                            |
| Devices   | Device Hygiene                 | <ul style="list-style-type: none"> <li>- Hand washed, dries slowly</li> <li>- Machine washed, dries quickly</li> <li>- Mouthpiece can be washed, but not replaced</li> <li>- Mouthpiece can be replaced, but not washed</li> <li>- Mouthpiece can be cleaned with a dry cloth, but not washed or replaced</li> </ul>      | Bouman et al.,2016 [1]<br>Hawken et al.,2017 [4]  |
| Devices   | Easy to Use                    | <ul style="list-style-type: none"> <li>- 1 step</li> <li>- 2 to 3 steps</li> <li>- More than 4 steps</li> <li>- You will use an automatic pump (process requiring ~15 steps)</li> <li>- You will use a manual pump (process requiring ~30 steps)</li> </ul>                                                               | Hawken et al.,2017 [4]<br>Nafees et al.,2016 [3]  |
| Devices   | Flexibility of device handling | <ul style="list-style-type: none"> <li>- Inhaler can be held in any position throughout inhalation process</li> <li>- Inhaler must be held in certain position throughout inhalation process</li> </ul>                                                                                                                   | Hawken et al.,2017 [4]                            |
| Devices   | Time to use per treatment      | <ul style="list-style-type: none"> <li>- 5 minutes</li> <li>- 10 minutes</li> <li>- 15 minutes</li> <li>- 25 minutes</li> <li>- 30 minutes</li> <li>- You will spend up to 30 minutes</li> <li>- You will spend up to 1 hour</li> <li>- You will spend up to 1.5 hours</li> <li>- You will spend up to 2 hours</li> </ul> | Mohamed et al.,2015 [5]<br>Nafees et al.,2016 [3] |

| DCE Topic          | Attribute                                                    | Levels                                                                                                                                                                                                                                                                                                                                                                                                                                                                                                                                       | Reference                                                                                               |
|--------------------|--------------------------------------------------------------|----------------------------------------------------------------------------------------------------------------------------------------------------------------------------------------------------------------------------------------------------------------------------------------------------------------------------------------------------------------------------------------------------------------------------------------------------------------------------------------------------------------------------------------------|---------------------------------------------------------------------------------------------------------|
| Devices (Coaching) | Frequency of use                                             | <ul style="list-style-type: none"> <li>- None</li> <li>- 2 pills 3 times a day (6 pills per day)</li> <li>- 3 pills 4 times a day (12 pills per day)</li> <li>- 2 times per day</li> <li>- 3 times per day</li> <li>- Once every two days on average</li> <li>- Once every day on average</li> <li>- Twice a day on average</li> <li>- Three times a day on average</li> <li>- Once per day</li> <li>- Once per week</li> <li>- Once per month</li> <li>- Once per 3 months</li> <li>- Once per 6 months</li> <li>- Once per year</li> </ul> | Marshall et al.,2017 [6]<br>Mohamed et al.,2015 [5]<br>Nafees et al.,2016 [3]<br>Quaife et al.,2016 [7] |
| Coaching           | Training of the IP (information provider)                    | <ul style="list-style-type: none"> <li>- Counselor with specialized training in use of medications during pregnancy only</li> <li>- Family doctor with general health training</li> </ul>                                                                                                                                                                                                                                                                                                                                                    | Hancock-Howard et al.,2012 [8]                                                                          |
| Coaching           | Method of counseling and waiting time                        | <ul style="list-style-type: none"> <li>- Make an appointment and meet with the IP in person in 3 days</li> <li>- Call a telephone service and receive the information within 30-minutes</li> </ul>                                                                                                                                                                                                                                                                                                                                           | Hancock-Howard et al.,2012 [8]                                                                          |
| Coaching           | Knowing the IP                                               | <ul style="list-style-type: none"> <li>- You have met the IP before and they know your medical history</li> <li>- You have never met the IP</li> </ul>                                                                                                                                                                                                                                                                                                                                                                                       | Hancock-Howard et al.,2012 [8]                                                                          |
| Coaching           | Confidence in the skills of the IP                           | <ul style="list-style-type: none"> <li>- You have confidence in the skills of the IP</li> <li>- You know nothing about the skills of the IP</li> </ul>                                                                                                                                                                                                                                                                                                                                                                                       | Hancock-Howard et al.,2012 [8]                                                                          |
| Coaching           | Helpfulness of information                                   | <ul style="list-style-type: none"> <li>- Enough information has been provided that you believe your question has been answered to your satisfaction</li> <li>- Some information has been provided to you, but your question has not been completely answered to your satisfaction</li> </ul>                                                                                                                                                                                                                                                 | Hancock-Howard et al.,2012 [8]                                                                          |
| Coaching           | Time away from home/office/usual activities including travel | <ul style="list-style-type: none"> <li>- More than four hours</li> <li>- 3–4 h</li> <li>- 1–2 h</li> </ul>                                                                                                                                                                                                                                                                                                                                                                                                                                   | Spinks et al.,2016 [9]                                                                                  |
| Coaching           | Wait time to get result                                      | <ul style="list-style-type: none"> <li>- Up to three days</li> <li>- Up to one day</li> <li>- Less than four hours</li> </ul>                                                                                                                                                                                                                                                                                                                                                                                                                | Spinks et al.,2016 [9]                                                                                  |
| Coaching           | Who reviews the result                                       | <ul style="list-style-type: none"> <li>- GP</li> <li>- Telederm dermatologist</li> </ul>                                                                                                                                                                                                                                                                                                                                                                                                                                                     | Spinks et al.,2016 [9]                                                                                  |
| Coaching Diabetes  | Feedback on physical activity performance                    | <ul style="list-style-type: none"> <li>- Patient receives feedback on his or her individual performance</li> <li>- Patient's performance is compared with that of other patients</li> </ul>                                                                                                                                                                                                                                                                                                                                                  | Ramirez et al.,2016 [10]                                                                                |
| Coaching Diabetes  | Physical activity behavior-change education                  | <ul style="list-style-type: none"> <li>- Patient's doctor recommends the educational content</li> <li>- Patient specifies the type of educational content he or she wants to receive</li> </ul>                                                                                                                                                                                                                                                                                                                                              | Ramirez et al.,2016 [10]                                                                                |
| Coaching Diabetes  | Frequency of messaging                                       | <ul style="list-style-type: none"> <li>- Patient's doctor recommends how often patient should receive messages</li> <li>- Patient specifies how often he or she wants to receive messages</li> </ul>                                                                                                                                                                                                                                                                                                                                         | Ramirez et al.,2016 [10]                                                                                |

| DCE Topic          | Attribute                  | Levels                                                                                                                                                                                                                                                                                                                                                                                                                                                                                                                                                                                                                                                                                                                                                                                                                                                                                                                                                                                                                                                                                                                                                                     | Reference                                                                                                        |
|--------------------|----------------------------|----------------------------------------------------------------------------------------------------------------------------------------------------------------------------------------------------------------------------------------------------------------------------------------------------------------------------------------------------------------------------------------------------------------------------------------------------------------------------------------------------------------------------------------------------------------------------------------------------------------------------------------------------------------------------------------------------------------------------------------------------------------------------------------------------------------------------------------------------------------------------------------------------------------------------------------------------------------------------------------------------------------------------------------------------------------------------------------------------------------------------------------------------------------------------|------------------------------------------------------------------------------------------------------------------|
| Lifestyle Diabetes | Menu schedule              | <ul style="list-style-type: none"> <li>- <i>Flexible</i> you set your own goals and develop your own menu schedule to reach these goals without the assistance of a lifestyle coach</li> <li>- <i>General</i> your lifestyle coach informs you about health and unhealthy foods, using food information and examples of recipes</li> <li>- <i>Elaborate</i> your lifestyle coach develops a menu schedule that meets your needs and wishes</li> <li>- Flexible: primarily based on the participants' own initiatives and ideas</li> <li>- General: includes general information on a healthy diet and provides example recipes</li> <li>- Elaborate: a patient tailored schedule that is completely prepared by the lifestyle coach</li> <li>- Flexible (you composed this schedule)</li> <li>- General (with information about diet and examples of recipes)</li> <li>- Elaborate (this schedule is composed for you and tailored to your needs)</li> </ul>                                                                                                                                                                                                               | Salampessy et al.,2015 [11]<br>Veldwijk et al.,2013 [12]<br>Wanders et al.,2014 [13]                             |
| Lifestyle Diabetes | Physical activity schedule | <ul style="list-style-type: none"> <li>- Patient's doctor recommends physical activity goals</li> <li>- Patient selects his or her own personalized physical activity goals</li> <li>- <i>Flexible</i> you set your own goals and develop your own activity schedule to reach these goals without the assistance of a lifestyle coach</li> <li>- <i>General</i> your lifestyle coach informs you about what physical activities would be good for you, using information about physical activity and examples of exercises</li> <li>- <i>Elaborate</i> your lifestyle coach develops a physical activity schedule that meets your needs and wishes</li> <li>- Flexible: primarily based on the participants' own initiatives and ideas</li> <li>- General: includes general information on PA, and provides example exercises</li> <li>- Elaborate: a patient tailored schedule that is completely prepared by the lifestyle coach</li> <li>- Flexible (you composed this schedule)</li> <li>- General (with information about physical activity and examples of exercises)</li> <li>- Elaborate (this schedule is composed for you and tailored to your needs)</li> </ul> | Ramirez et al.,2016 [10]<br>Salampessy et al.,2015 [11]<br>Veldwijk et al.,2013 [12]<br>Wanders et al.,2014 [13] |

| DCE Topic                         | Attribute                                     | Levels                                                                                                                                                                                                                                                                                                                                                                                                                                                                                                                                                                                                                                                                                                                     | Reference                                                                                                        |
|-----------------------------------|-----------------------------------------------|----------------------------------------------------------------------------------------------------------------------------------------------------------------------------------------------------------------------------------------------------------------------------------------------------------------------------------------------------------------------------------------------------------------------------------------------------------------------------------------------------------------------------------------------------------------------------------------------------------------------------------------------------------------------------------------------------------------------------|------------------------------------------------------------------------------------------------------------------|
| Coaching<br>Lifestyle<br>Diabetes | Consultation<br>Structure / Social<br>support | <ul style="list-style-type: none"> <li>- Family members learn how to offer support</li> <li>- Patient meets other patients so they can support one another</li> <li>- <i>Individual</i> the consultations of the lifestyle program are individually</li> <li>- <i>Consultation 5</i> the consultations of the lifestyle program are in groups of 5 other patients</li> <li>- <i>Consultation 10</i> the consultations of the lifestyle program are in groups of 10 other patients</li> <li>- Individually</li> <li>- Groups with 5 other T2DM patients</li> <li>- Groups with 10 other T2DM patients</li> <li>- individual</li> <li>- in a group with 5 other people</li> <li>- in a group with 10 other people</li> </ul> | Ramirez et al.,2016 [10]<br>Salampessy et al.,2015 [11]<br>Veldwijk et al.,2013 [12]<br>Wanders et al.,2014 [13] |
| Lifestyle<br>Diabetes             | Time spent on the program                     | <ul style="list-style-type: none"> <li>- 2.5 hours per week</li> <li>- 4 hours per week</li> </ul>                                                                                                                                                                                                                                                                                                                                                                                                                                                                                                                                                                                                                         | Van Gils et al.,2011 [14]                                                                                        |
| Lifestyle<br>Diabetes             | Arrangement physical activity lessons         | <ul style="list-style-type: none"> <li>- Individually with men and women</li> <li>- With people of the same gender</li> </ul>                                                                                                                                                                                                                                                                                                                                                                                                                                                                                                                                                                                              | Van Gils et al.,2011 [14]                                                                                        |
| Lifestyle<br>Diabetes             | Group activity                                | <ul style="list-style-type: none"> <li>- Only with people without diabetes</li> <li>- Only with other diabetes patients</li> </ul>                                                                                                                                                                                                                                                                                                                                                                                                                                                                                                                                                                                         | Van Gils et al.,2011 [14]                                                                                        |
| Lifestyle<br>Diabetes             | Sports activity                               | <ul style="list-style-type: none"> <li>- Walking/cycling</li> <li>- Fitness (treadmill, rowing machine, bicycle)</li> </ul>                                                                                                                                                                                                                                                                                                                                                                                                                                                                                                                                                                                                | Van Gils et al.,2011 [14]                                                                                        |
| Lifestyle<br>Diabetes             | Counseling                                    | <ul style="list-style-type: none"> <li>- None</li> <li>- Physical therapist/sports teacher</li> </ul>                                                                                                                                                                                                                                                                                                                                                                                                                                                                                                                                                                                                                      | Van Gils et al.,2011 [14]                                                                                        |

### References of supplementary material

- [1] Bouman AC, Cate-Hoek AJ ten, Dirksen CD, et al. Eliciting patients' preferences for elastic compression stocking therapy after deep vein thrombosis: potential for improving compliance. *J Thromb Haemost* 2016;14:510–7. doi:10.1111/jth.13228
- [2] Bunge EM, Bekker-Grob EW de, van Biezen FC, et al. Patients' preferences for scoliosis brace treatment: a discrete choice experiment. *Spine* 2010;35:57–63. doi:10.1097/BRS.0b013e3181bdeaa6
- [3] Nafees B, Lloyd AJ, Ballinger RS, et al. Managing neurogenic bowel dysfunction: what do patients prefer? A discrete choice experiment of patient preferences for transanal irrigation and standard bowel management. *Patient Prefer Adherence* 2016;10:195–204. doi:10.2147/PPA.S96082
- [4] Hawken N, Torvinen S, Neine M-E, et al. Patient preferences for dry powder inhaler attributes in asthma and chronic obstructive pulmonary disease in France: a discrete choice experiment. *BMC Pulm Med* 2017;17:99. doi:10.1186/s12890-017-0439-x

- [5] Mohamed AF, Johnson FR, Balp M-M, et al. Preferences and Stated Adherence for Antibiotic Treatment of Cystic Fibrosis Pseudomonas Infections. *Patient* 2016;9:59–67. doi:10.1007/s40271-015-0124-1
- [6] Marshall T, Pugh A, Fairchild A, et al. Patient Preferences for Device-Aided Treatments Indicated for Advanced Parkinson Disease. *Value Health* 2017;20:1383–93. doi:10.1016/j.jval.2017.06.001
- [7] Quaife M, Eakle R, Cabrera M, et al. Preferences for ARV-based HIV prevention methods among men and women, adolescent girls and female sex workers in Gauteng Province, South Africa: a protocol for a discrete choice experiment. *BMJ Open* 2016;6:e010682. doi:10.1136/bmjopen-2015-010682
- [8] Hancock-Howard RL, Ungar WJ, Marshall D, et al. Public preferences for counseling regarding antidepressant use during pregnancy: a discrete choice experiment. *Birth Defects Res Part A Clin Mol Teratol* 2012;94:532–9. doi:10.1002/bdra.23042
- [9] Spinks J, Janda M, Soyer HP, et al. Consumer preferences for teledermoscopy screening to detect melanoma early. *J Telemed Telecare* 2016;22:39–46. doi:10.1177/1357633X15586701
- [10] Ramirez M, Wu S, Beale E. Designing a Text Messaging Intervention to Improve Physical Activity Behavior Among Low-Income Latino Patients With Diabetes: A Discrete-Choice Experiment, Los Angeles, 2014-2015. *Prev Chronic Dis* 2016;13:E171. doi:10.5888/pcd13.160035
- [11] Salampessy BH, Veldwijk J, Jantine Schuit A, et al. The Predictive Value of Discrete Choice Experiments in Public Health: An Exploratory Application. *Patient* 2015;8:521–9. doi:10.1007/s40271-015-0115-2
- [12] Veldwijk J, Lambooy MS, van Gils PF, et al. Type 2 diabetes patients' preferences and willingness to pay for lifestyle programs: a discrete choice experiment. *BMC Public Health* 2013;13:1099. doi:10.1186/1471-2458-13-1099
- [13] Wanders JOP, Veldwijk J, Wit GA de, et al. The effect of out-of-pocket costs and financial rewards in a discrete choice experiment: an application to lifestyle programs. *BMC Public Health* 2014;14:870. doi:10.1186/1471-2458-14-870
- [14] van Gils PF, Lambooy MS, Flanderijn MH, et al. Willingness to participate in a lifestyle intervention program of patients with type 2 diabetes mellitus: a conjoint analysis. *Patient Prefer Adherence* 2011;5:537–46. doi:10.2147/PPA.S16854
